# Supplementary material for: Autophagy Alters Bladder Angiogenesis and Improves Bladder Hyperactivity in the Pathogenesis of Ketamine-Induced Cystitis in a Rat Model
Source: MDPI journal article supplement (doi:10.3390/biology10060488), 2021-05-30

# Western Blot

Urothelial layer (UL)

Muscular layer (ML)

Control (C)

Ketamine (K)

Ketamine+ Rapamycin (K+R)

Ketamine+ Wortmannin (K+W)

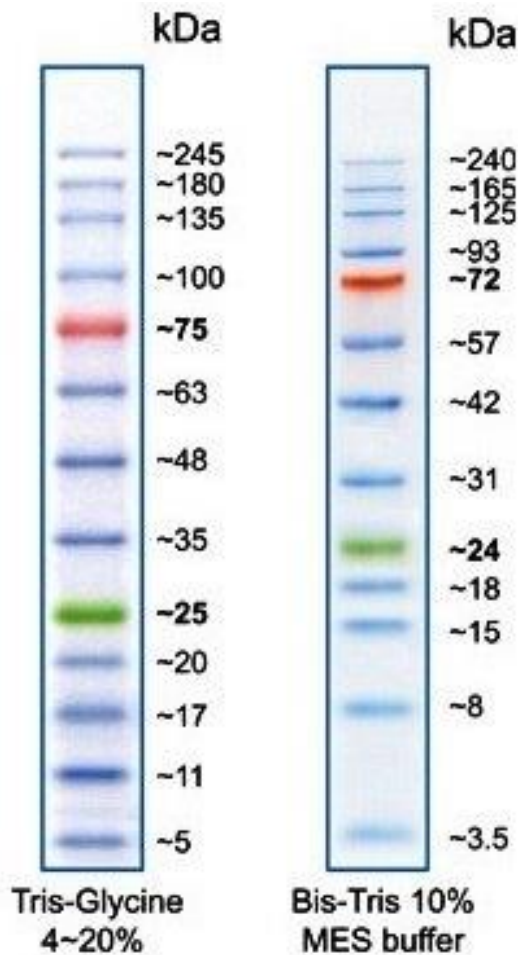

# Western blot

**Protein: mTOR**

**1<sup>o</sup> Ab:** Cell Signaling, rabbit monoclonal IgG

Catalog number: no.2983

Molecular weight (kDa):289 kDa

Working concentration: 1:1000

Gel (%): 8%

Control (C) Ketamine (K) Ketamine+ Rapamycin (K+R)

Ketamine+ Wortmannin (K+W)

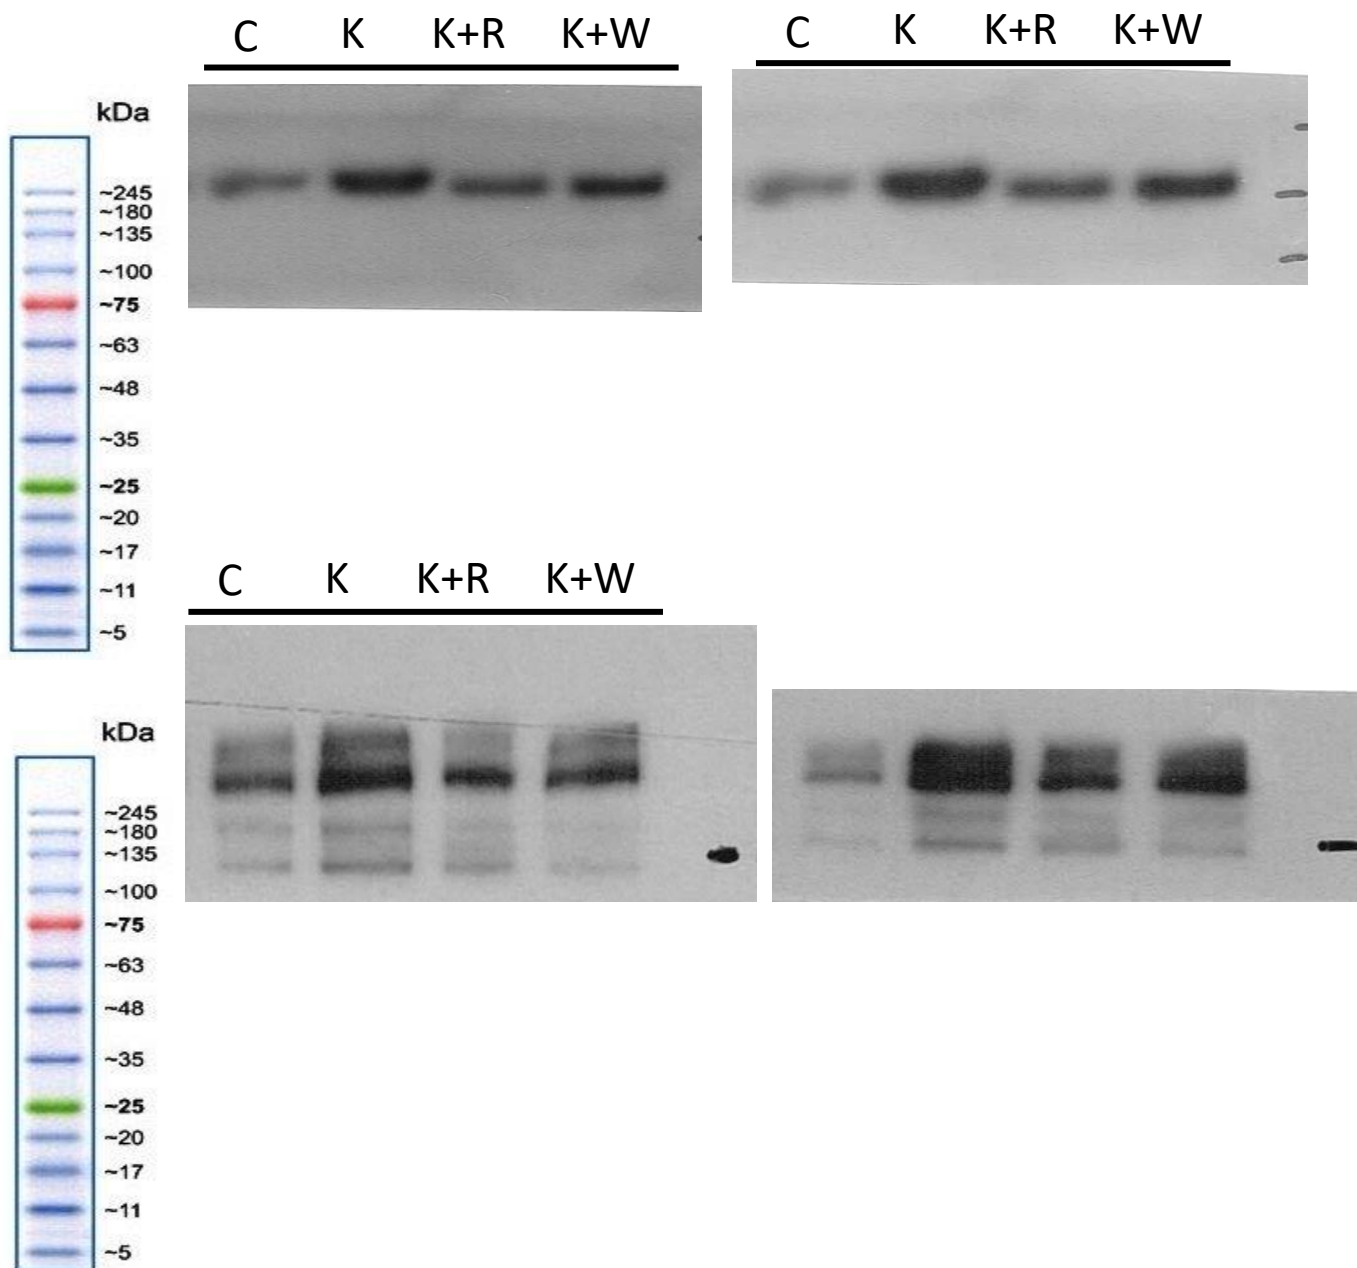

# Western blot

**Protein: p-mTOR**

**1<sup>o</sup> Ab:** Cell Signaling, rabbit monoclonal IgG

Catalog number: no.5536

Molecular weight (kDa):289 kDa

Working concentration: 1:1000

Gel (%): 8%

Control (C) Ketamine (K) Ketamine+ Rapamycin (K+R)

Ketamine+ Wortmannin (K+W)

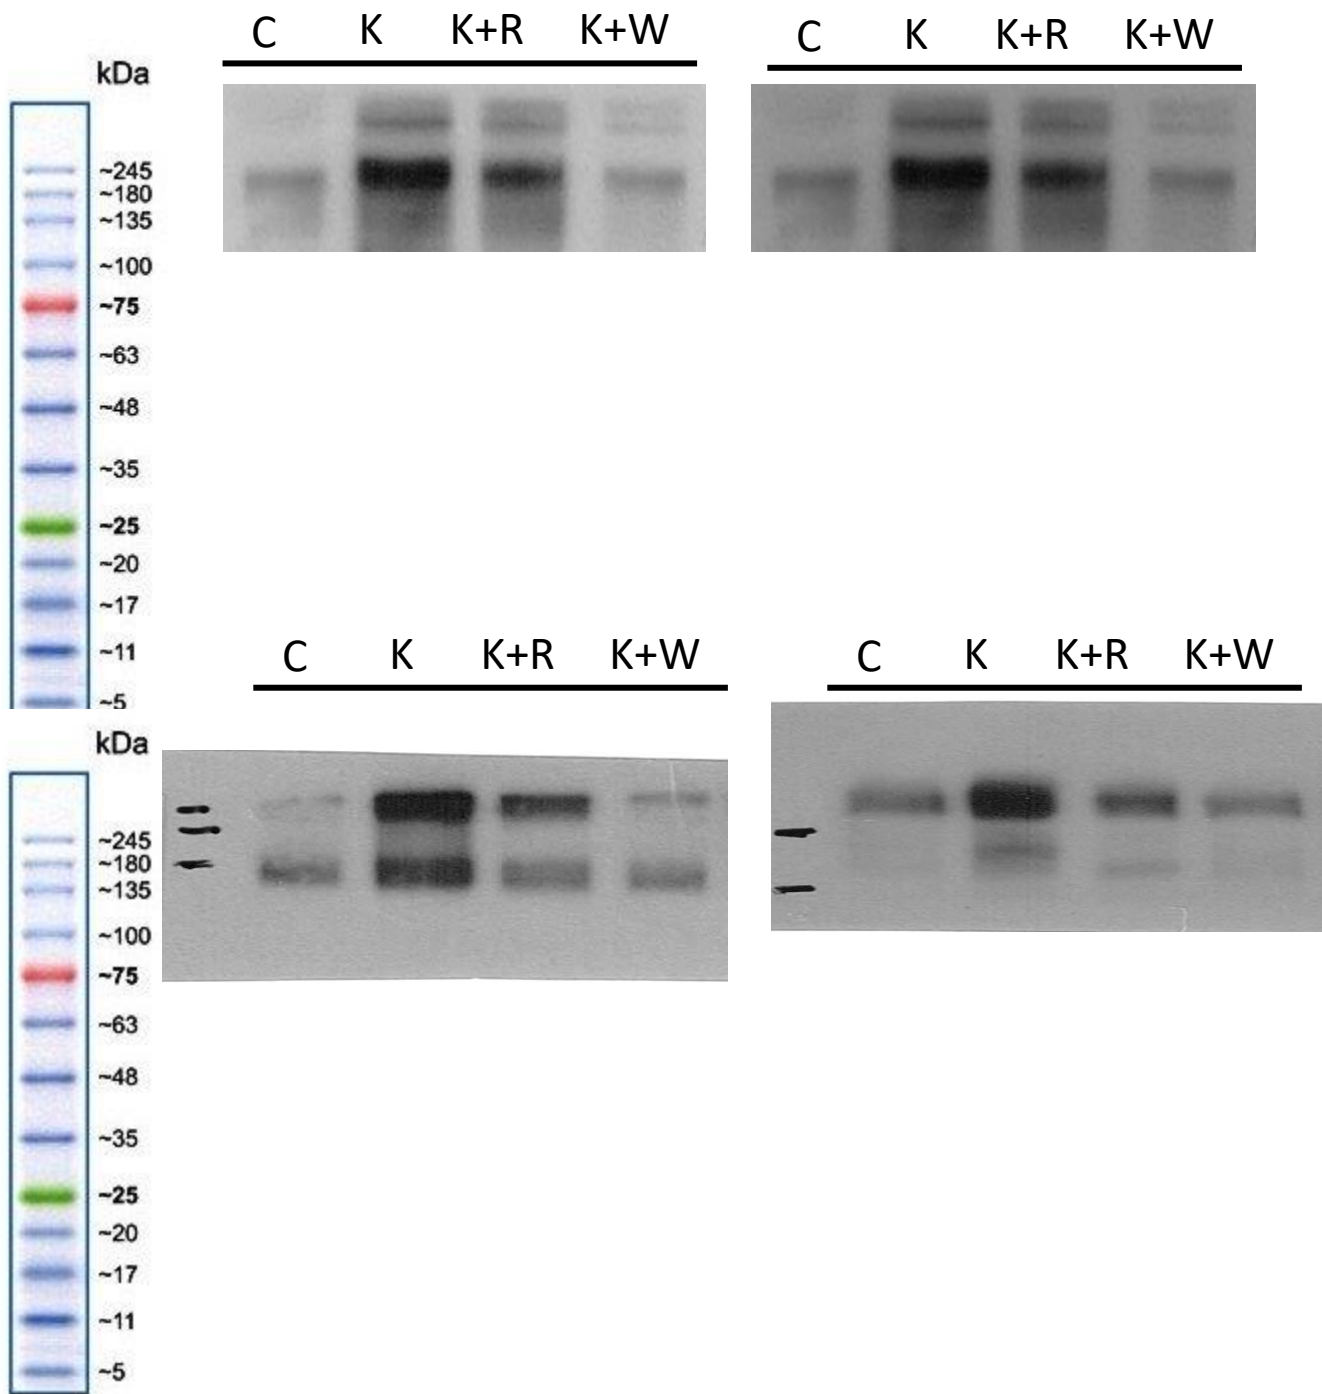

# Western blot

**Protein: Atg 12**

**1<sup>o</sup> Ab:** Proteintech, rabbit polyclonal IgG

Catalog number: no.11264-1-AP    Molecular weight (kDa):48-55 kDa

Working concentration: 1:1000    Gel (%): 8%

Control (C)    Ketamine (K)    Ketamine+ Rapamycin (K+R)

Ketamine+ Wortmannin (K+W)

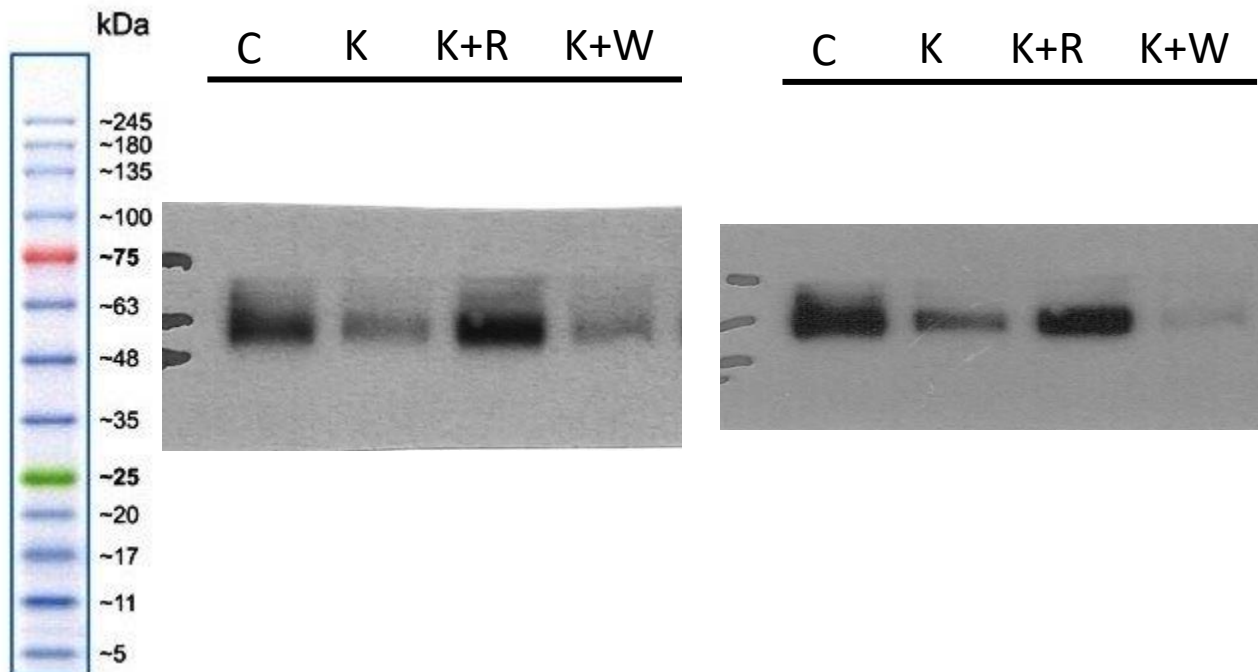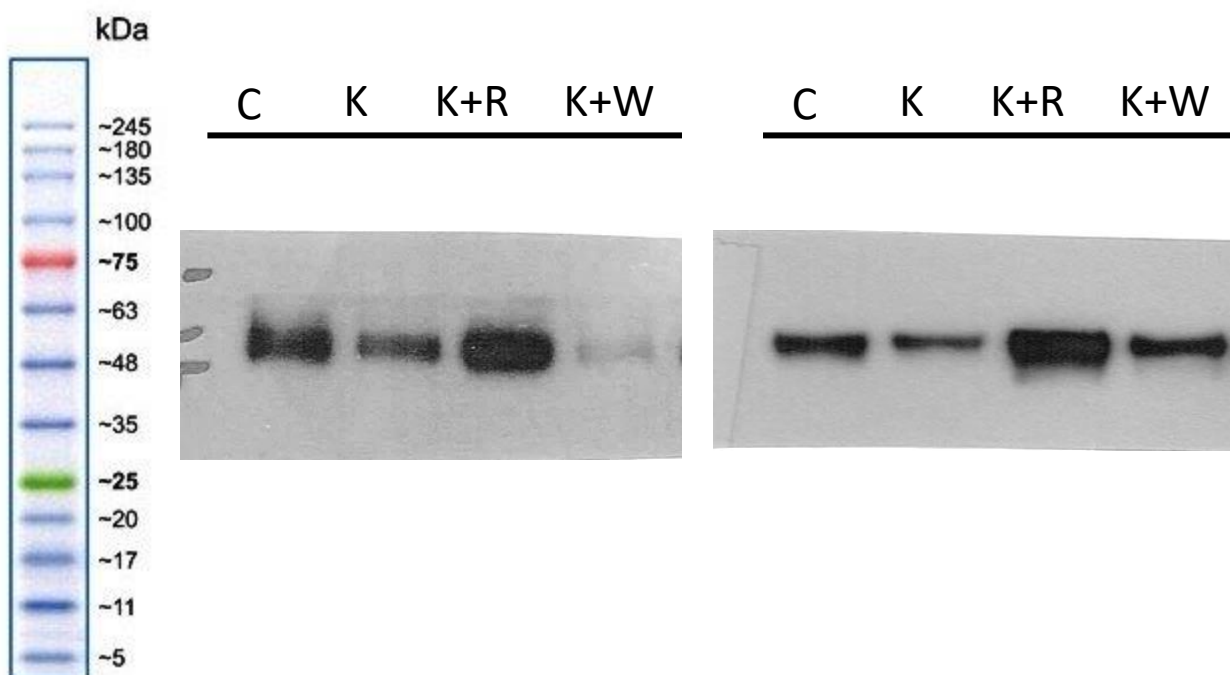

# Western blot

**Protein: Atg 7**

**1<sup>o</sup> Ab:** Cell Signaling, rabbit monoclonal IgG

Catalog number: no.8558

Molecular weight (kDa):78 kDa

Working concentration: 1:1000    Gel (%): 8%

Control (C)   Ketamine (K)   Ketamine+ Rapamycin (K+R)

Ketamine+ Wortmannin (K+W)

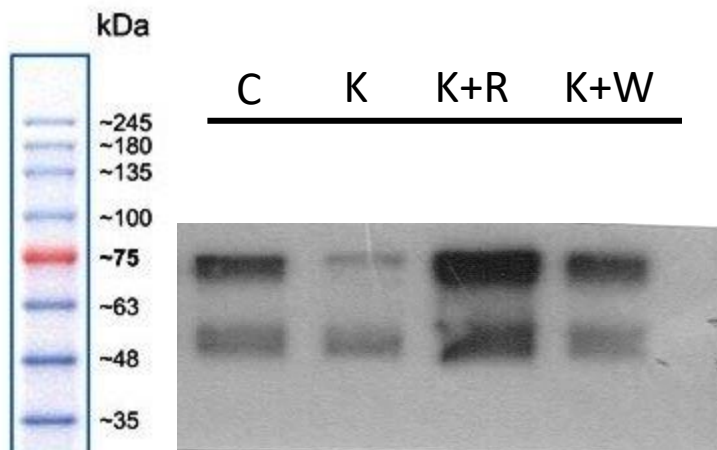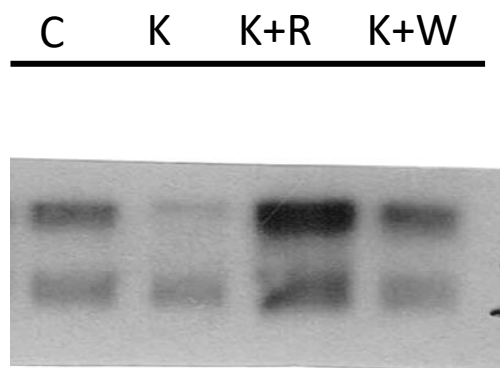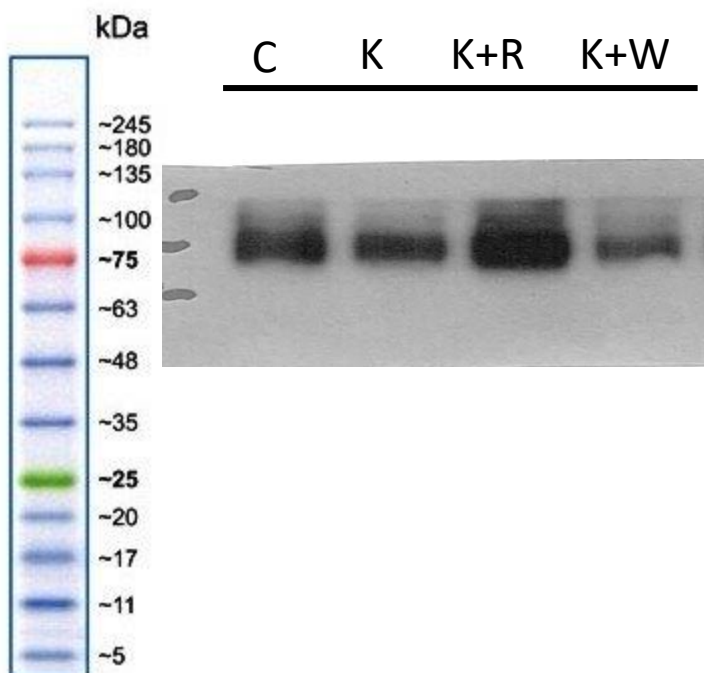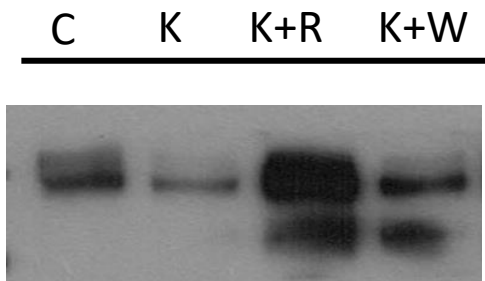

# Western blot

**Protein: Beclin 1 (Atg 6)**

**1<sup>o</sup> Ab:** Novus, rabbit polyclonal IgG

Catalog number: no.NBP1-76648

Molecular weight (kDa):52-55 kDa

Working concentration: 1:1000

Gel (%): 8%

Control (C) Ketamine (K) Ketamine+ Rapamycin (K+R)

Ketamine+ Wortmannin (K+W)

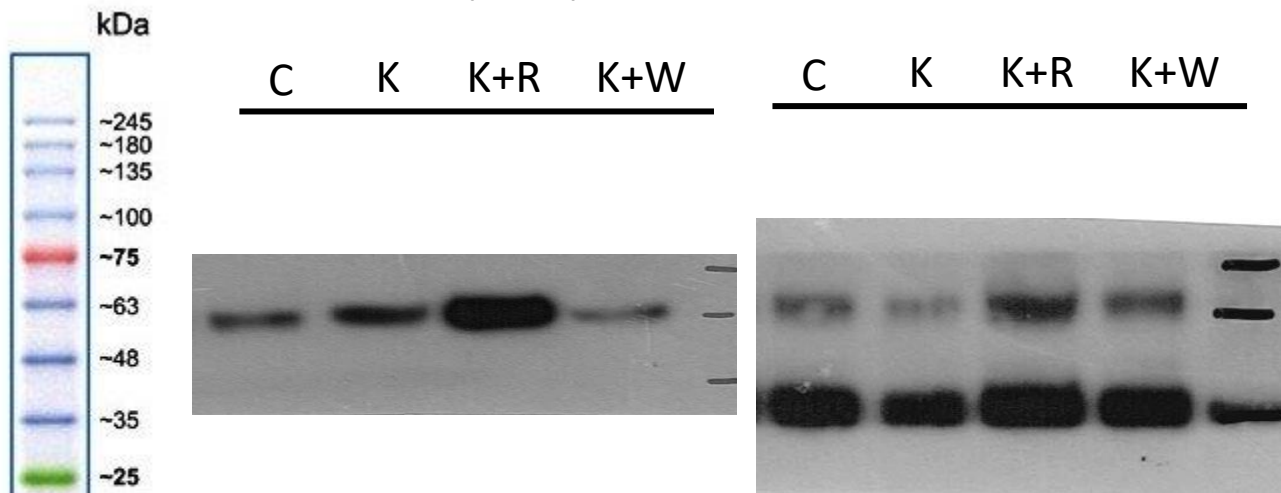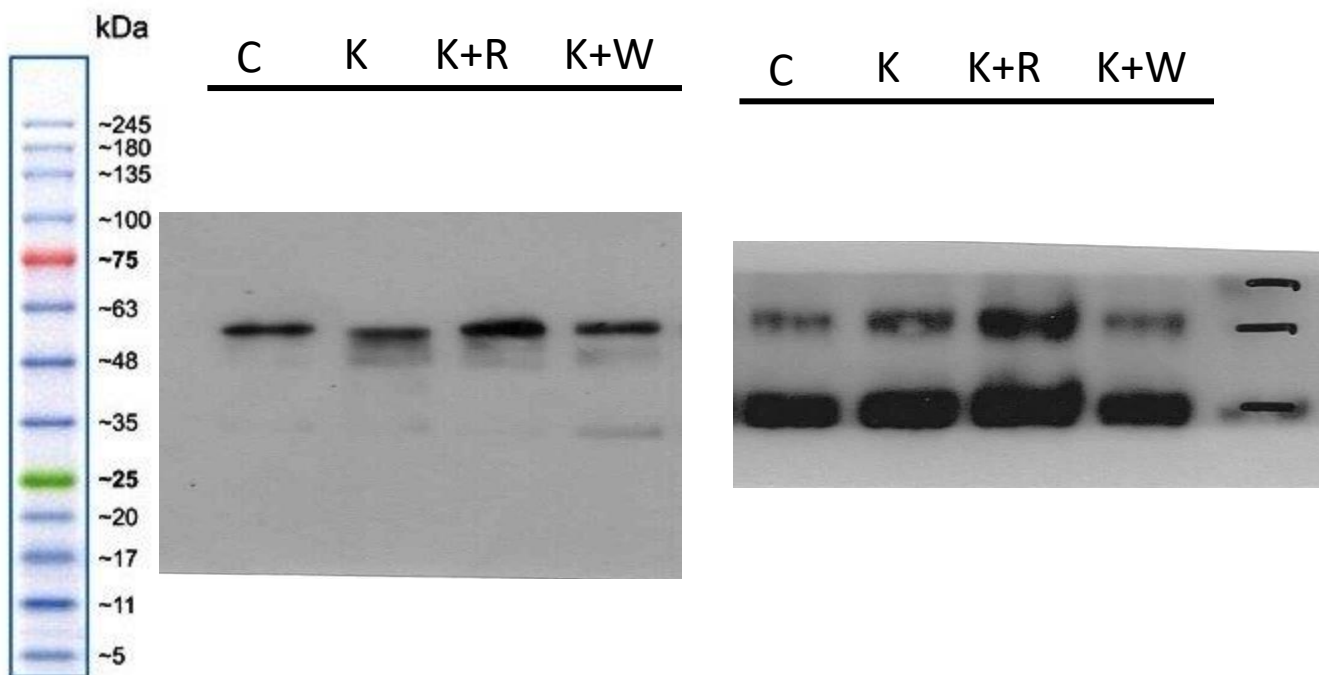



# Western blot

**Protein: LC3 (Atg 8)**

**1<sup>o</sup> Ab:** Cell Signaling, rabbit monoclonal IgG

Catalog number: no.4599

Molecular weight (kDa):14, 16 kDa

Working concentration: 1:1000

Gel (%): 8%

Control (C) Ketamine (K) Ketamine+ Rapamycin (K+R)

Ketamine+ Wortmannin (K+W)

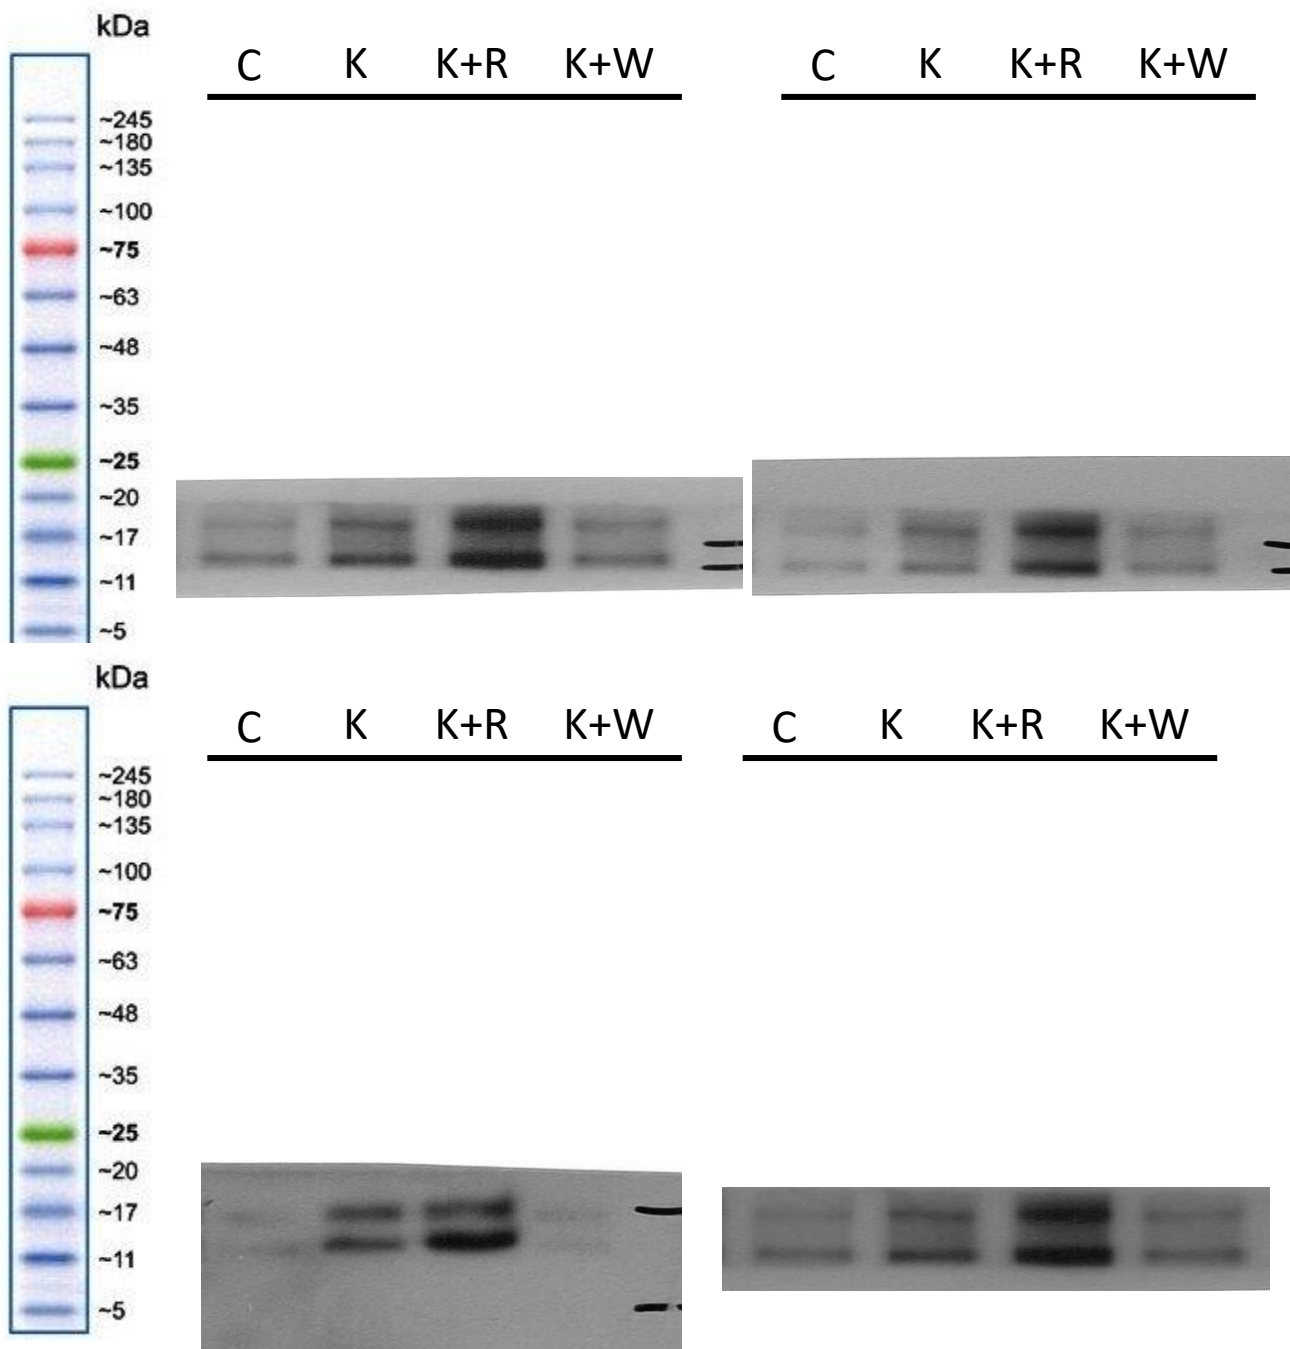

# Western blot

**Protein: VPS 34**

**1<sup>o</sup> Ab:** Cell Signaling, rabbit polyclonal IgG

Catalog number: no. 12452-1-AP

Molecular weight (kDa):100 kDa

Working concentration: 1:1000

Gel (%): 8%

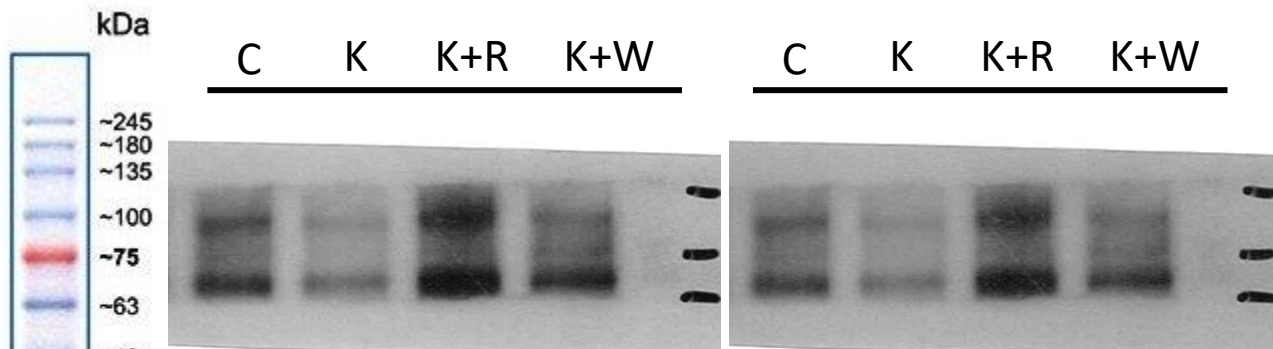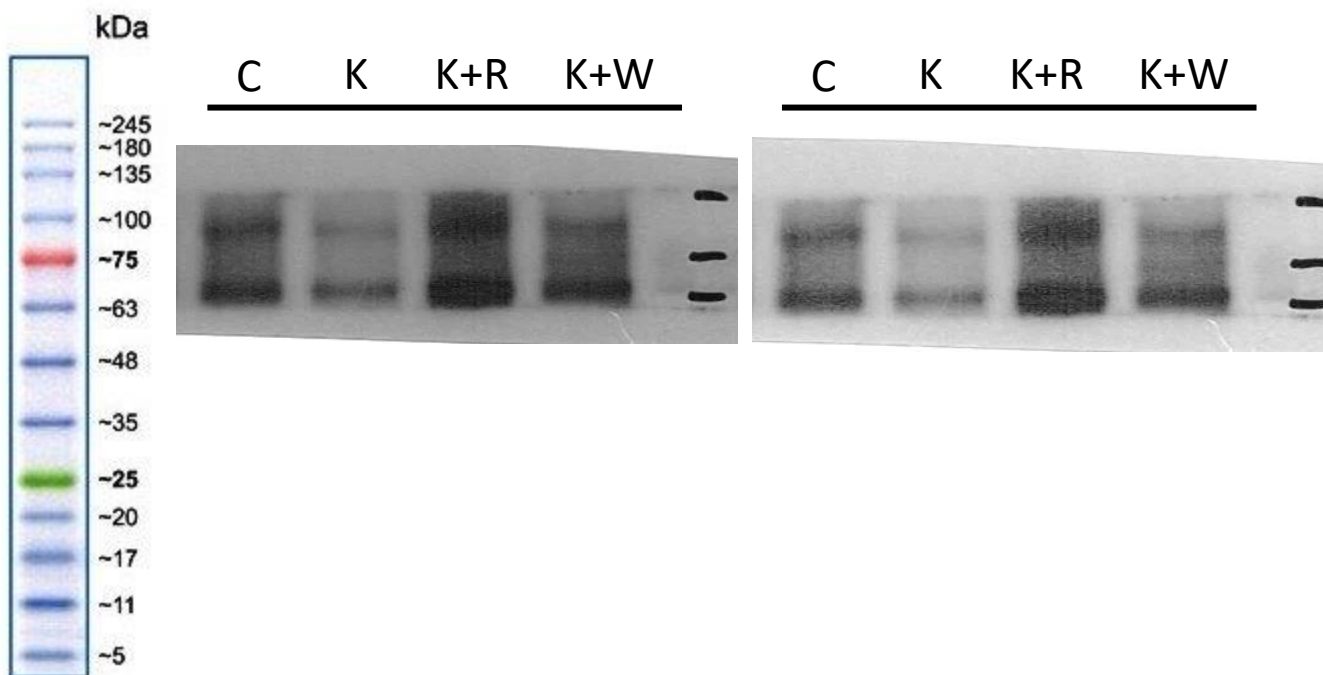



# Western blot

**Protein:  $\beta$ -Actin**

**1<sup>o</sup> Ab:** Cell Signaling, rabbit monoclonal IgG

Catalog number: no.4970S

Molecular weight (kDa):43 kDa

Working concentration: 1:5000

Gel (%): 8%

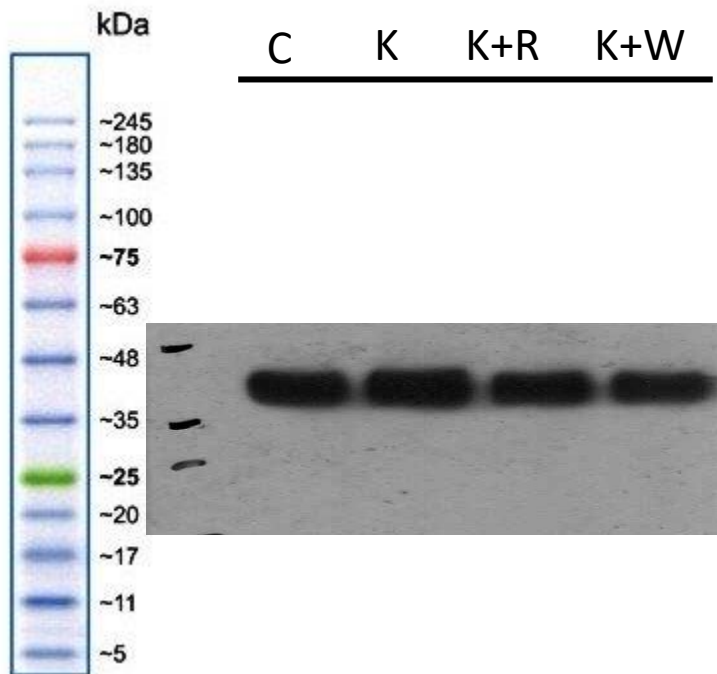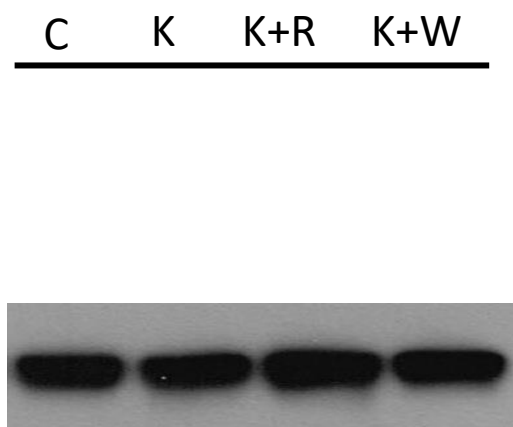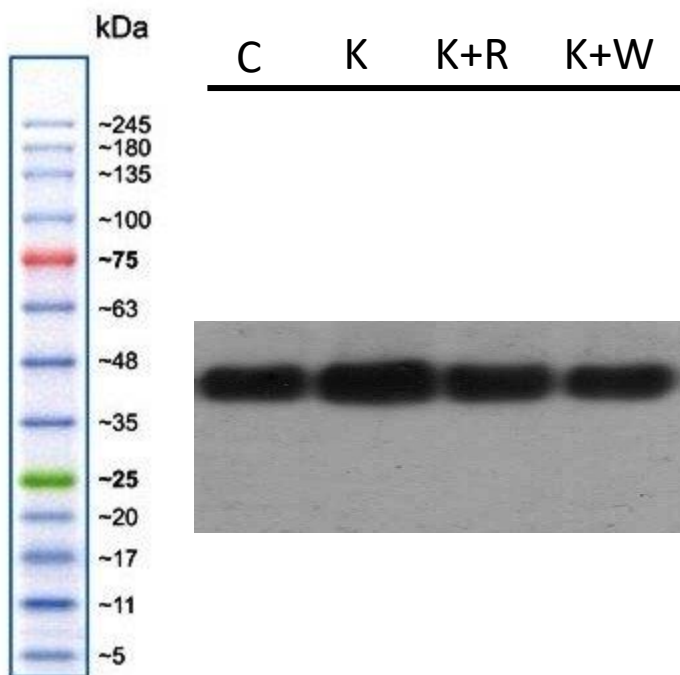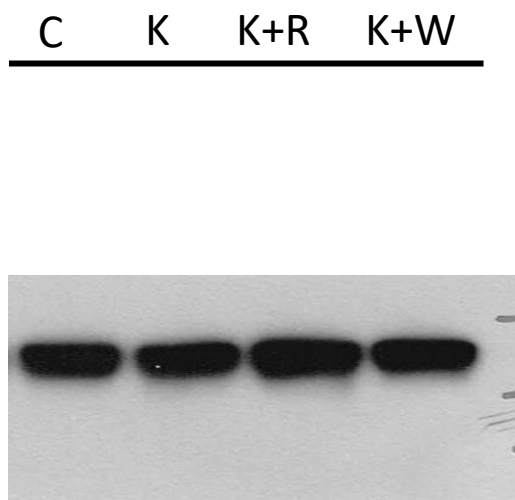

# Western blot

**Protein:  $\beta$ -Actin**

**1<sup>o</sup> Ab:** Cell Signaling, rabbit monoclonal IgG

Catalog number: no.4970S

Molecular weight (kDa):43 kDa

Working concentration: 1:5000

Gel (%): 8%

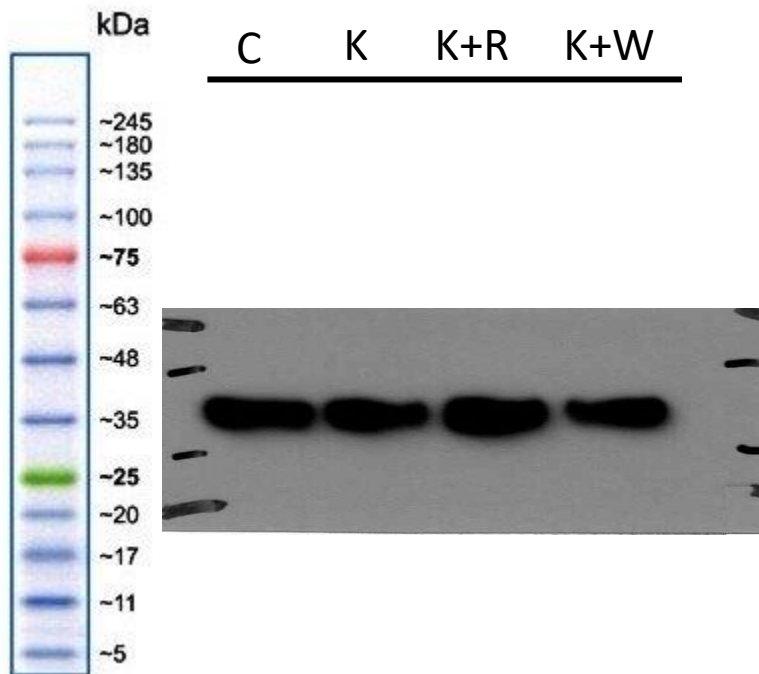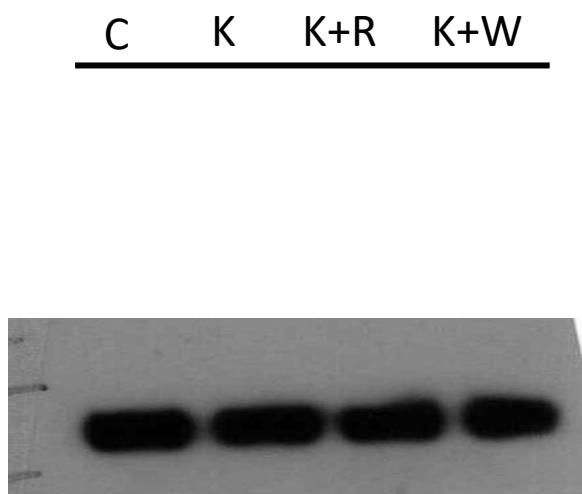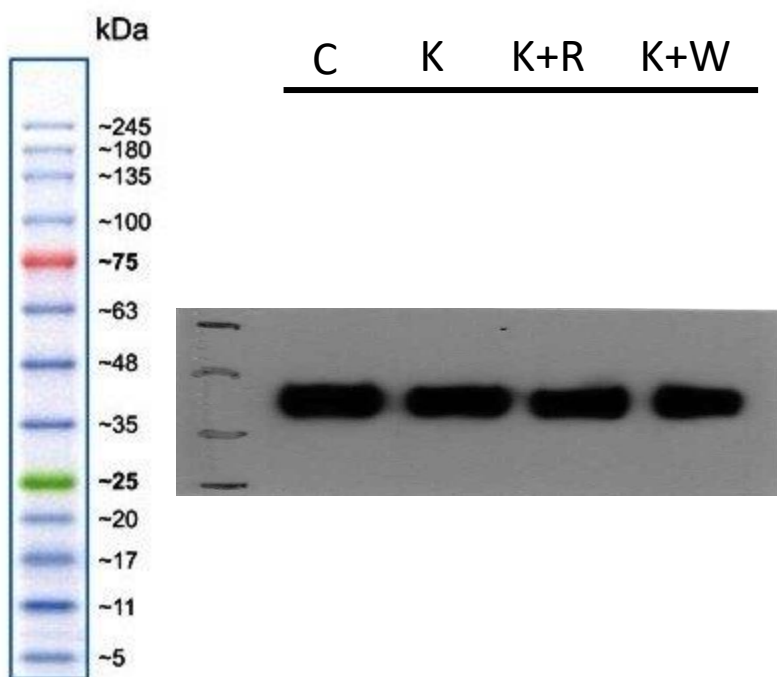

# Western blot

Protein:  $\alpha$ -SMA

1<sup>o</sup> Ab: Abcam, rabbit monoclonal IgG

Catalog number: no.ab5694

Molecular weight (kDa): 40 kDa

Working concentration: 1:5000

Gel (%): 8%

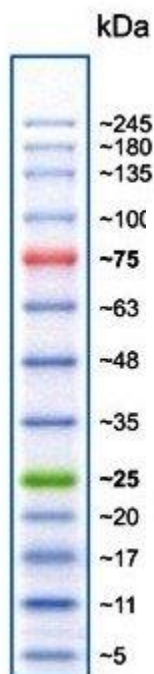

| UL |   |     |     | ML |   |     |     |
|----|---|-----|-----|----|---|-----|-----|
| C  | K | K+R | K+W | C  | K | K+R | K+W |

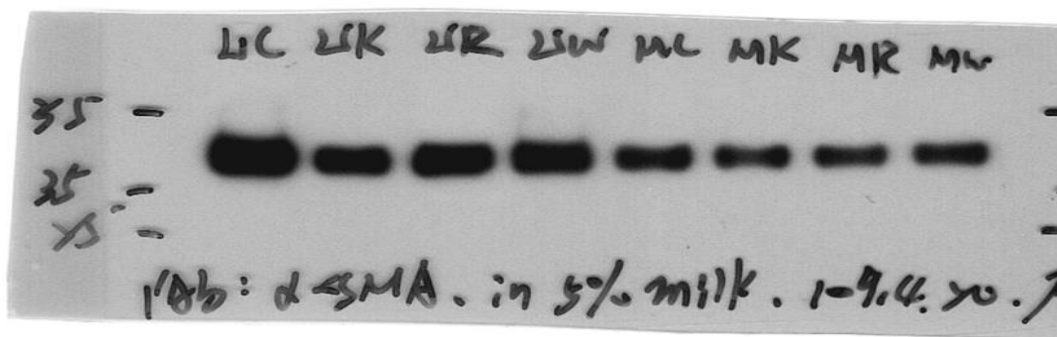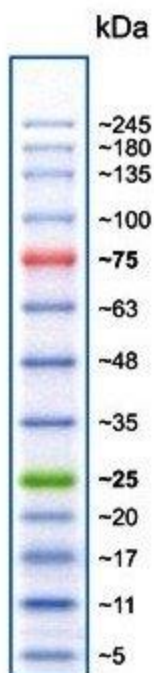

| UL |   |     |     | ML |   |     |     |
|----|---|-----|-----|----|---|-----|-----|
| C  | K | K+R | K+W | C  | K | K+R | K+W |

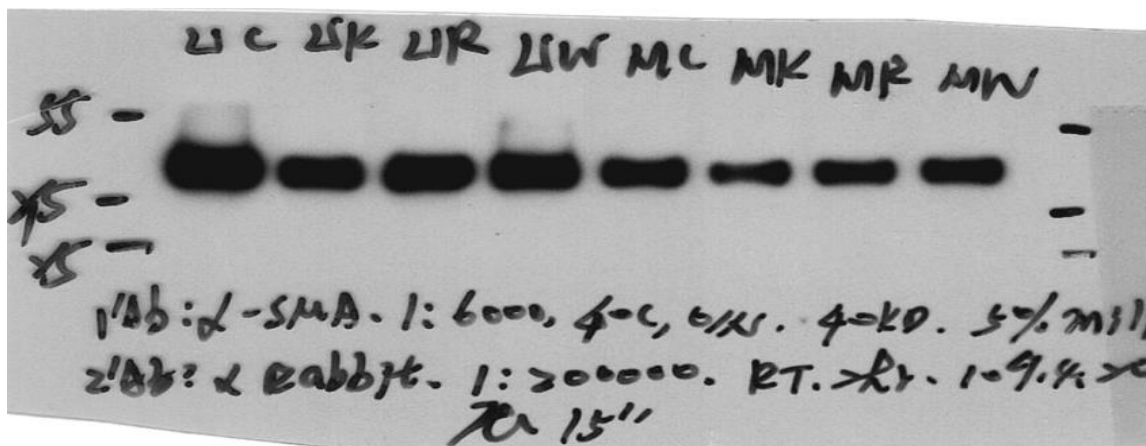

# Western blot

Protein:  $\alpha$ -SMA

1<sup>o</sup> Ab: Abcam, rabbit monoclonal IgG

Catalog number: no.ab5694

Molecular weight (kDa): 40 kDa

Working concentration: 1:5000

Gel (%): 8%

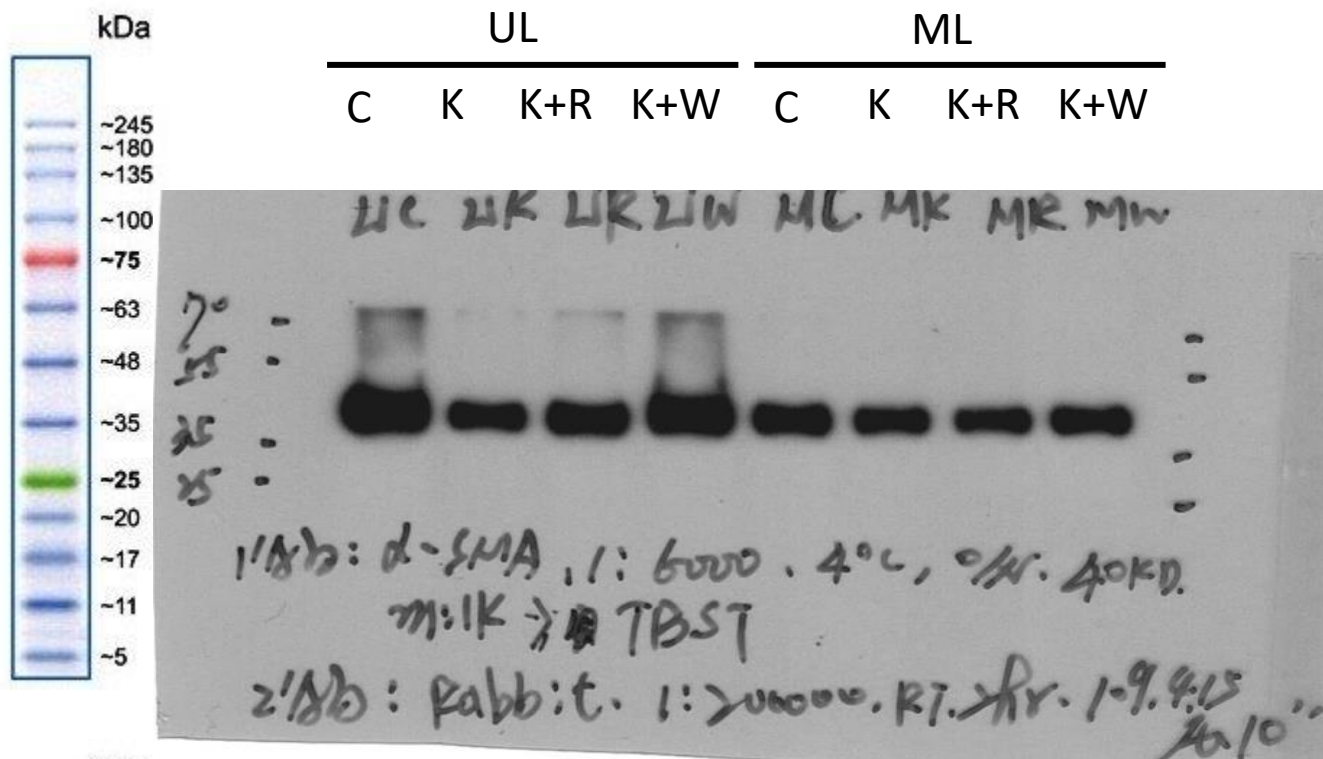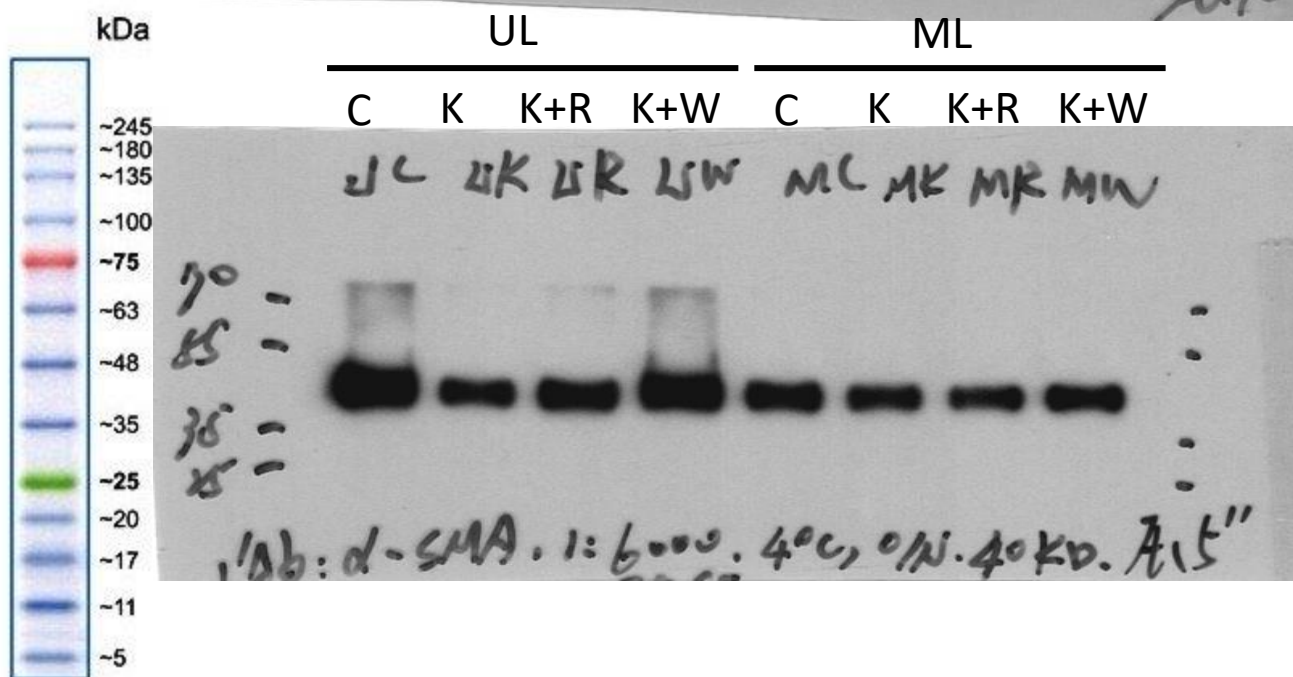



# Western blot

**Protein:  $\alpha$ -SMA**

**1<sup>o</sup> Ab:** Abcam, rabbit monoclonal IgG

Catalog number: no.ab5694

Molecular weight (kDa): 40 kDa

Working concentration: 1:5000

Gel (%): 8%

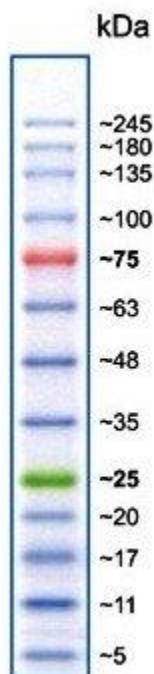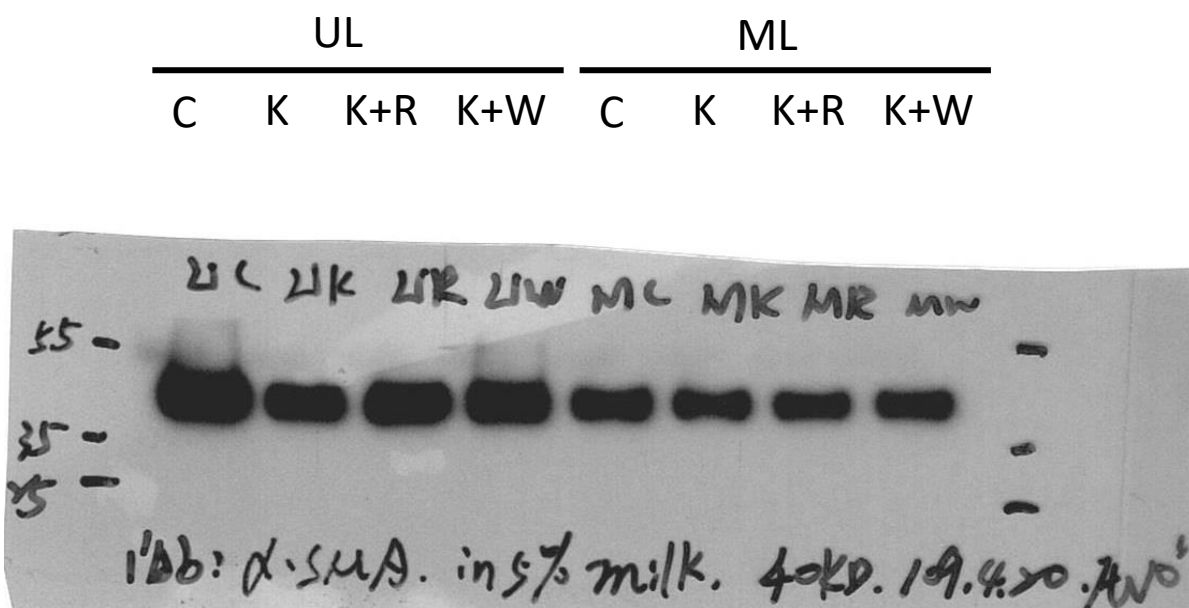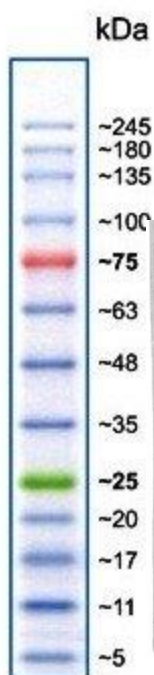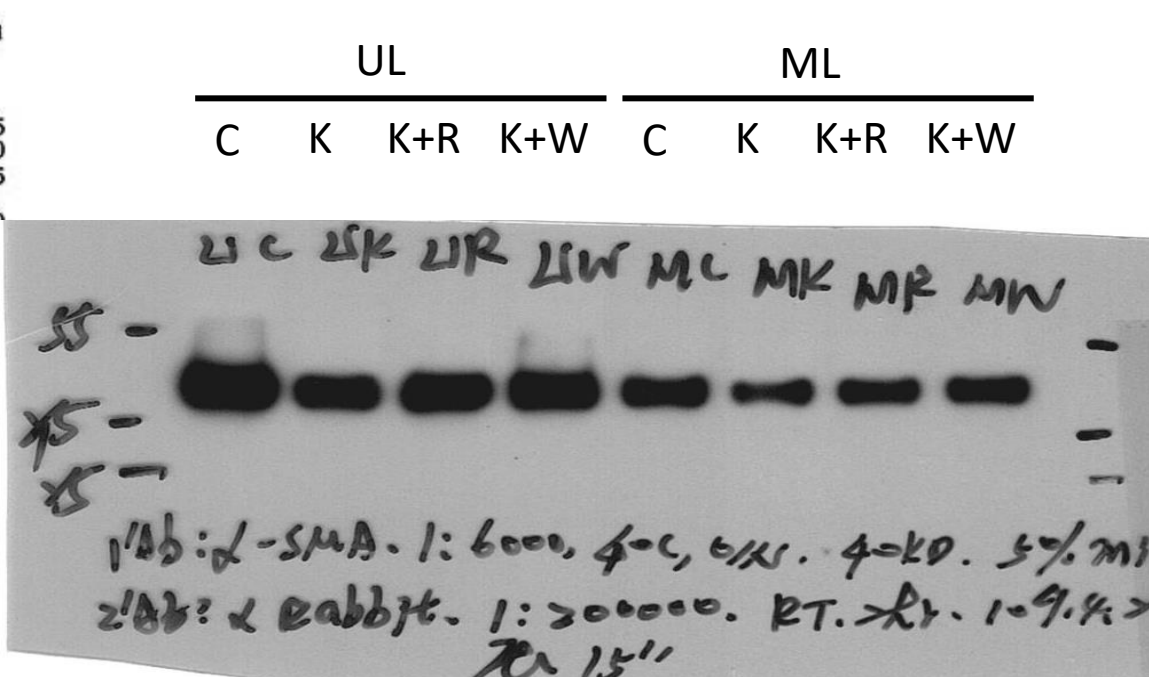

**Protein:  $\alpha$ -SMA**

Catalog number: no.ab5694

Molecular weight (kDa):40 kDa

Working concentration: 1:5000

Gel (%): 8%

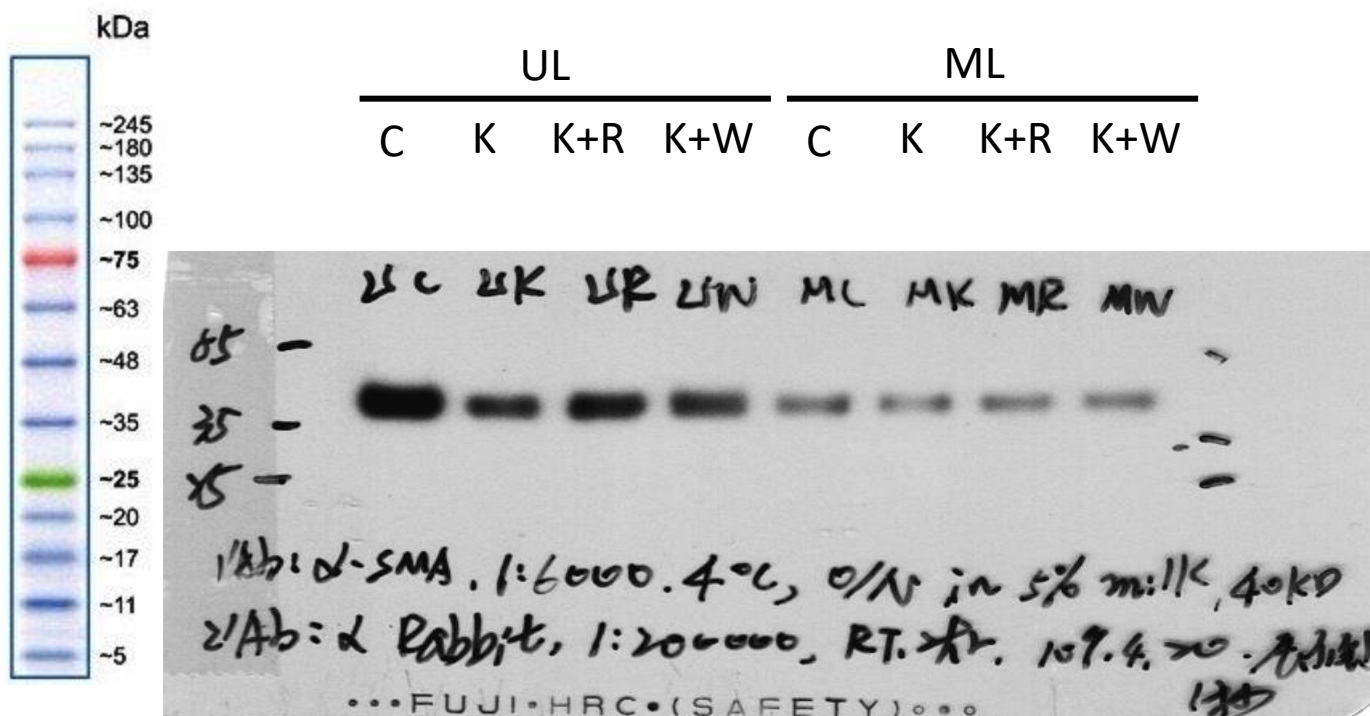



# Western blot

**Protein: CD31**

**1<sup>o</sup> Ab:** Abcam, mouse monoclonal IgG

Catalog number: no.9498

Molecular weight (kDa):83 kDa

Working concentration: 1:3000

Gel (%): 8%

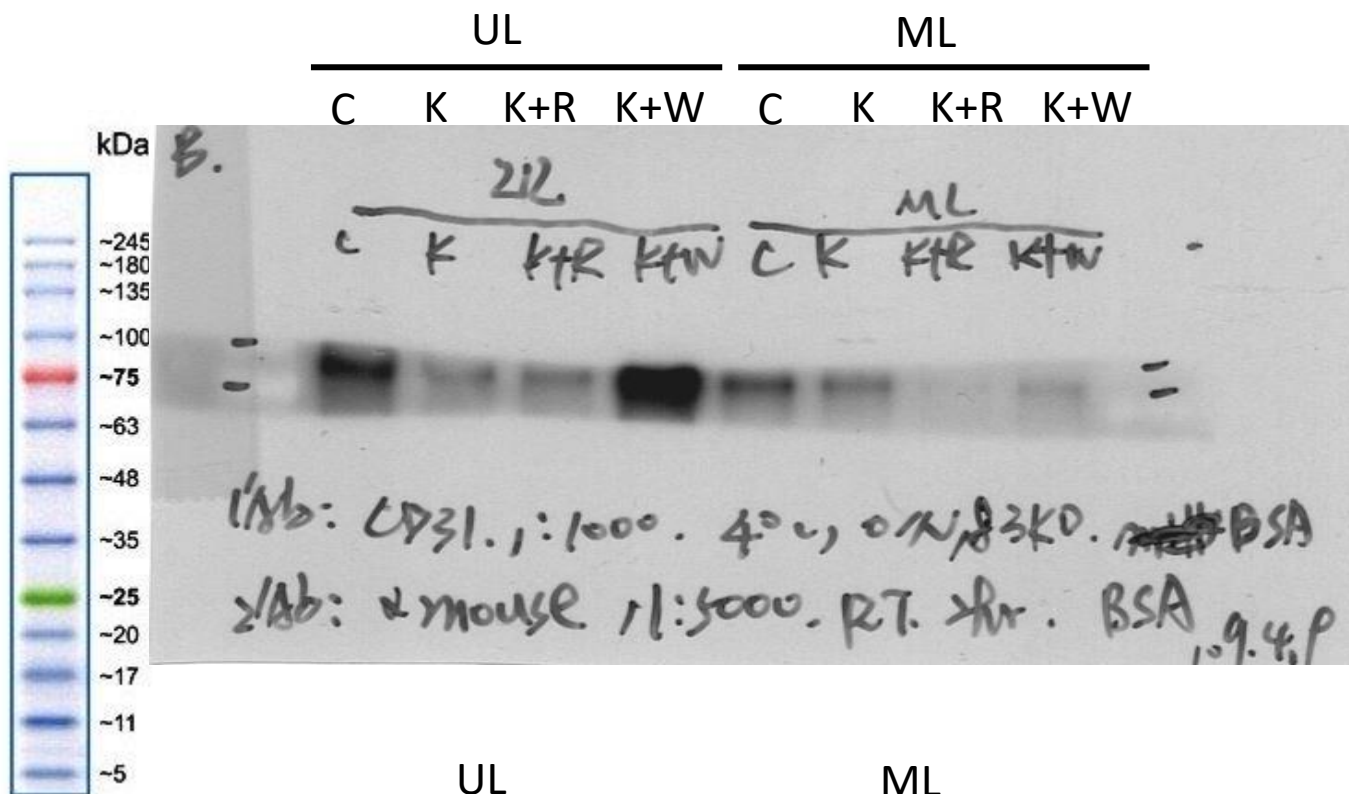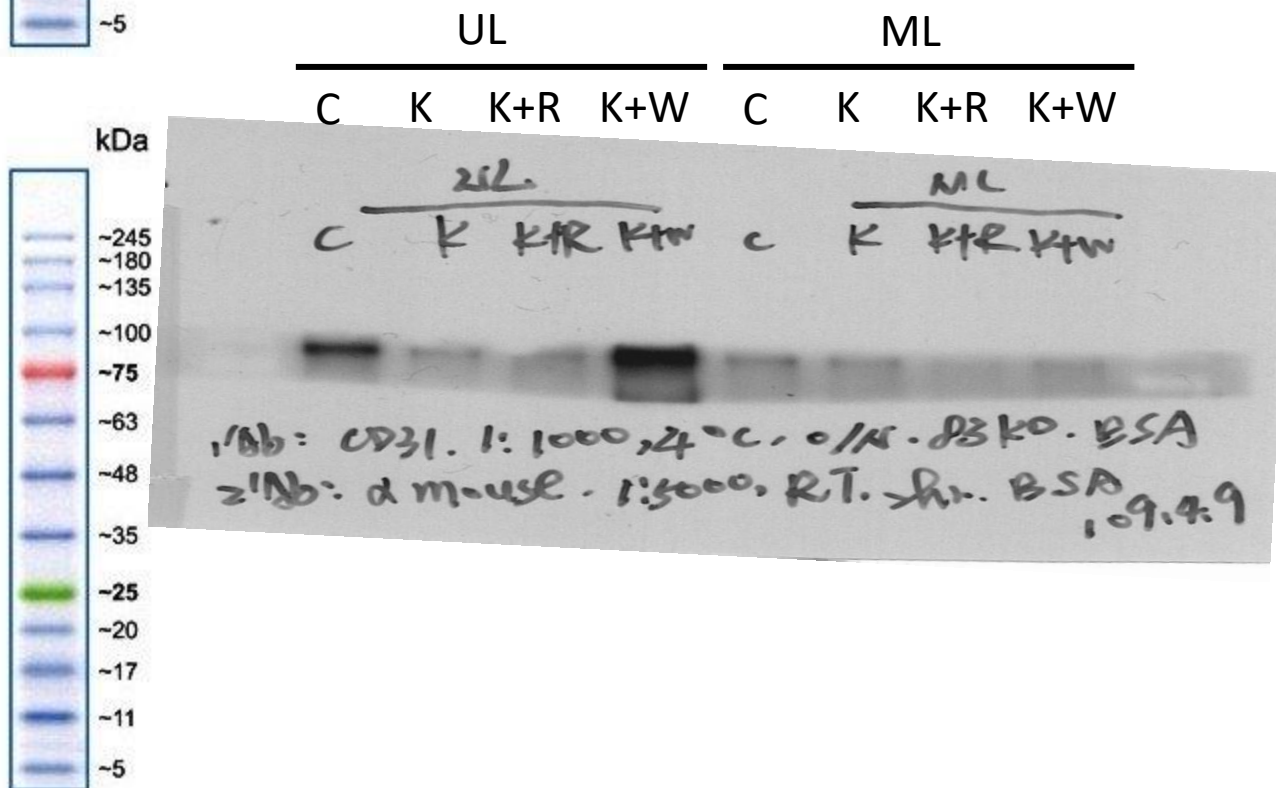

# Western blot

**Protein: CD31**

**1<sup>o</sup> Ab:** Abcam, mouse monoclonal IgG

Catalog number: no.9498

Molecular weight (kDa):83 kDa

Working concentration: 1:3000

Gel (%): 8%

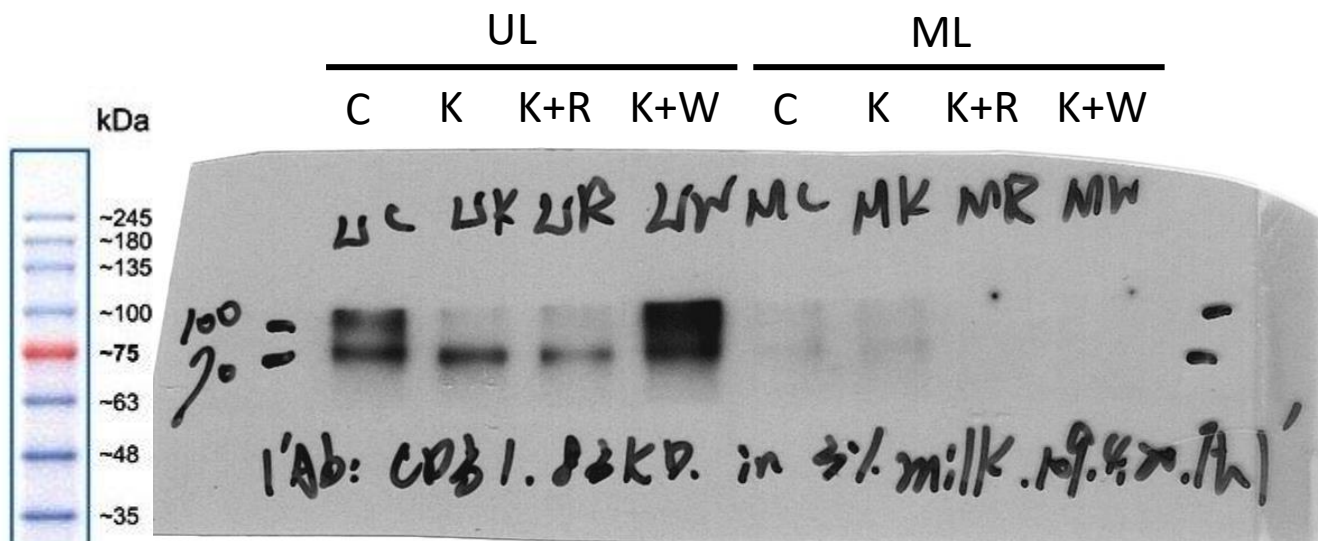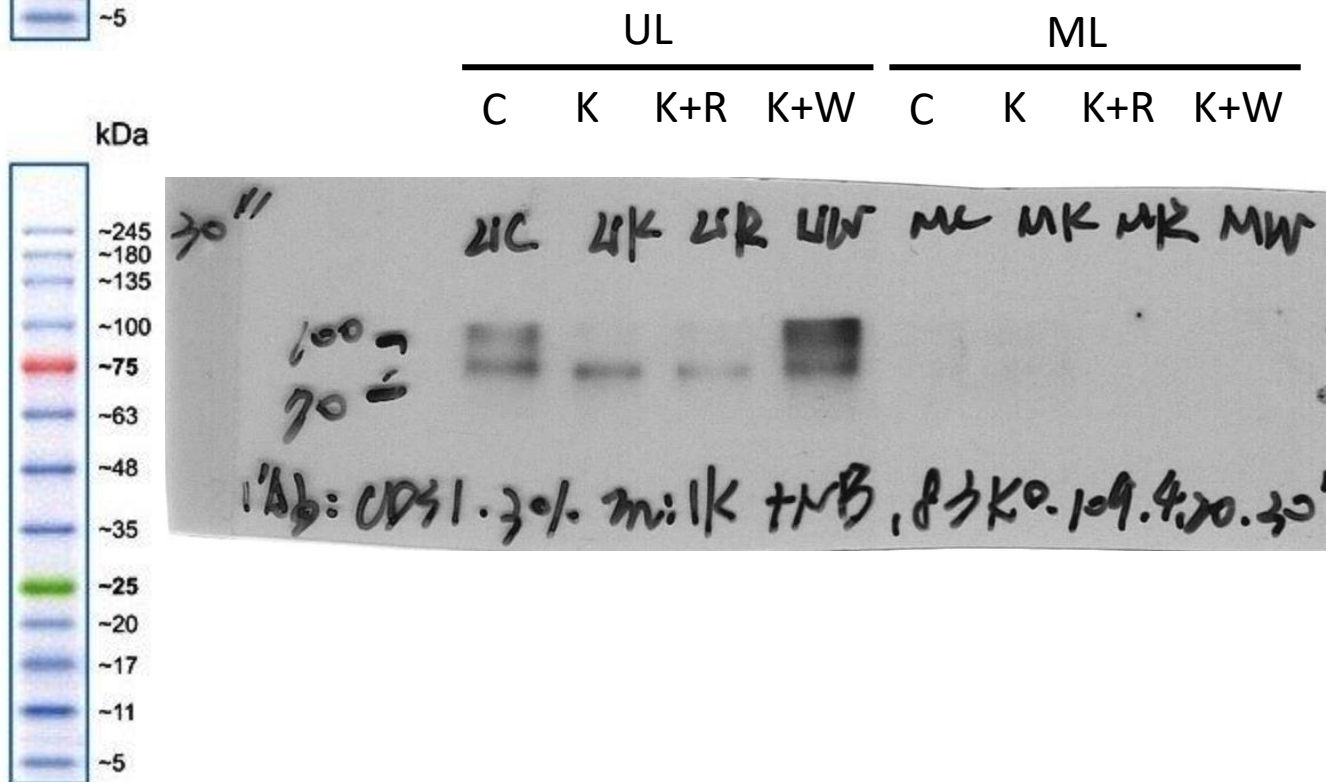

# Western blot

Protein: VEGF

1<sup>o</sup> Ab: Millipore, mouse monoclonal IgG

Catalog number: no.05443

Molecular weight (kDa):40 kDa

Working concentration: 1:2000

Gel (%): 8%

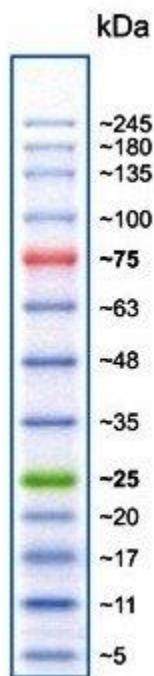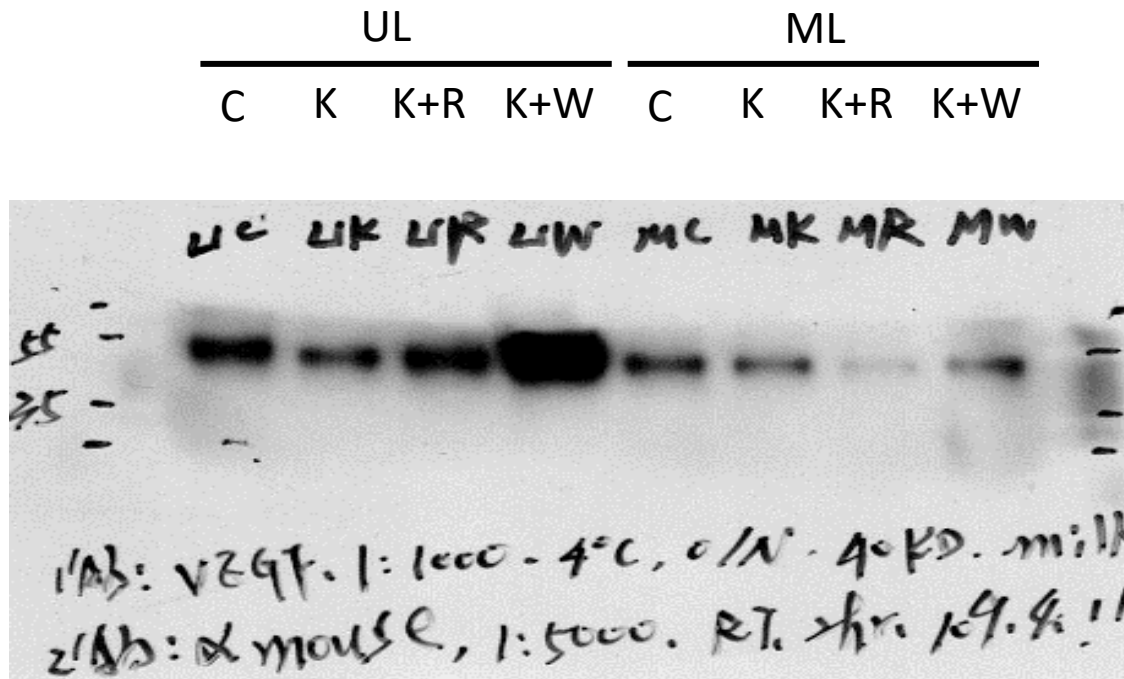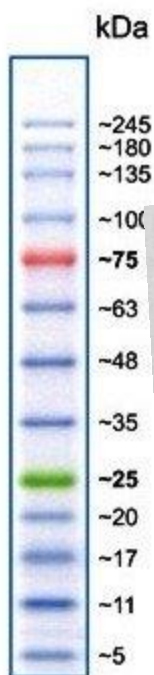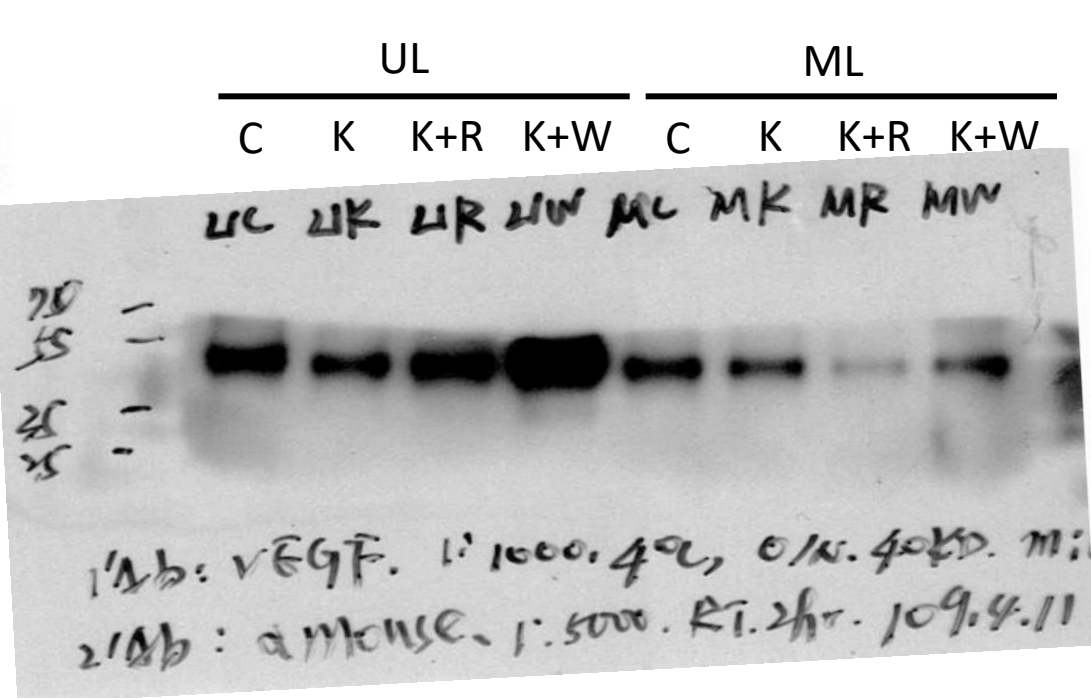



# Western blot

Protein: VEGF

1<sup>o</sup> Ab: Millipore, mouse monoclonal IgG

Catalog number: no.05443

Molecular weight (kDa):40 kDa

Working concentration: 1:2000

Gel (%): 8%

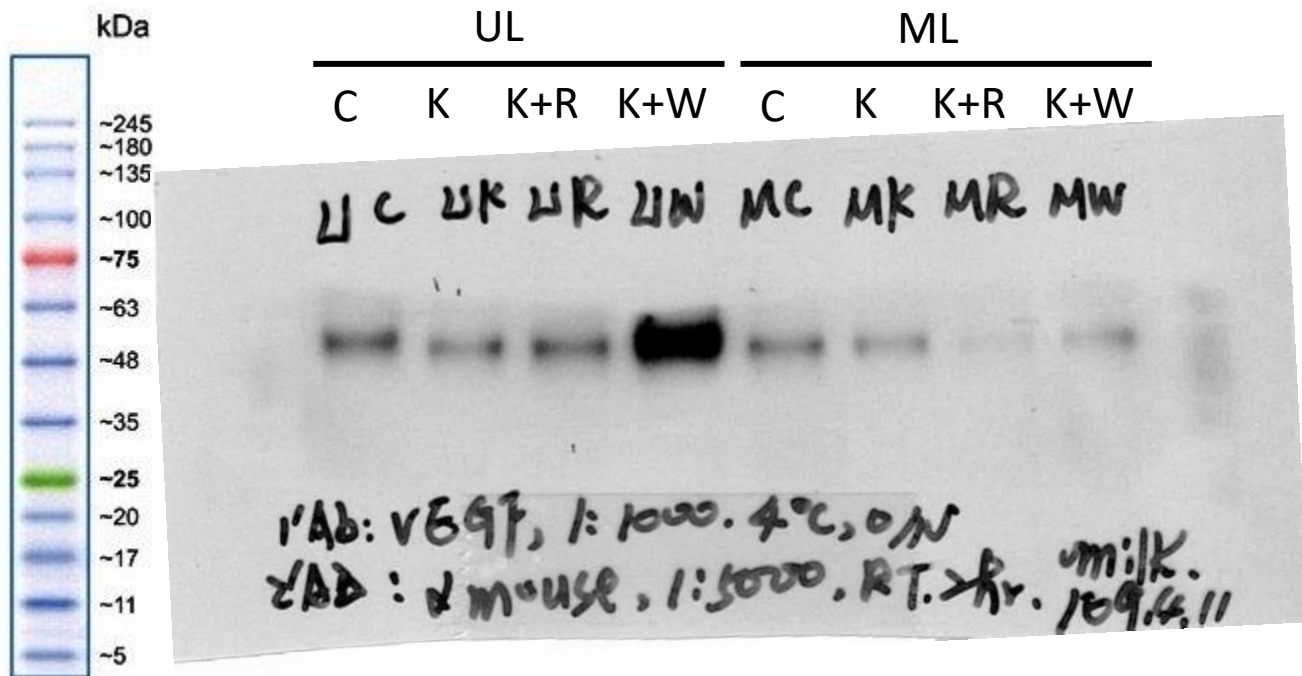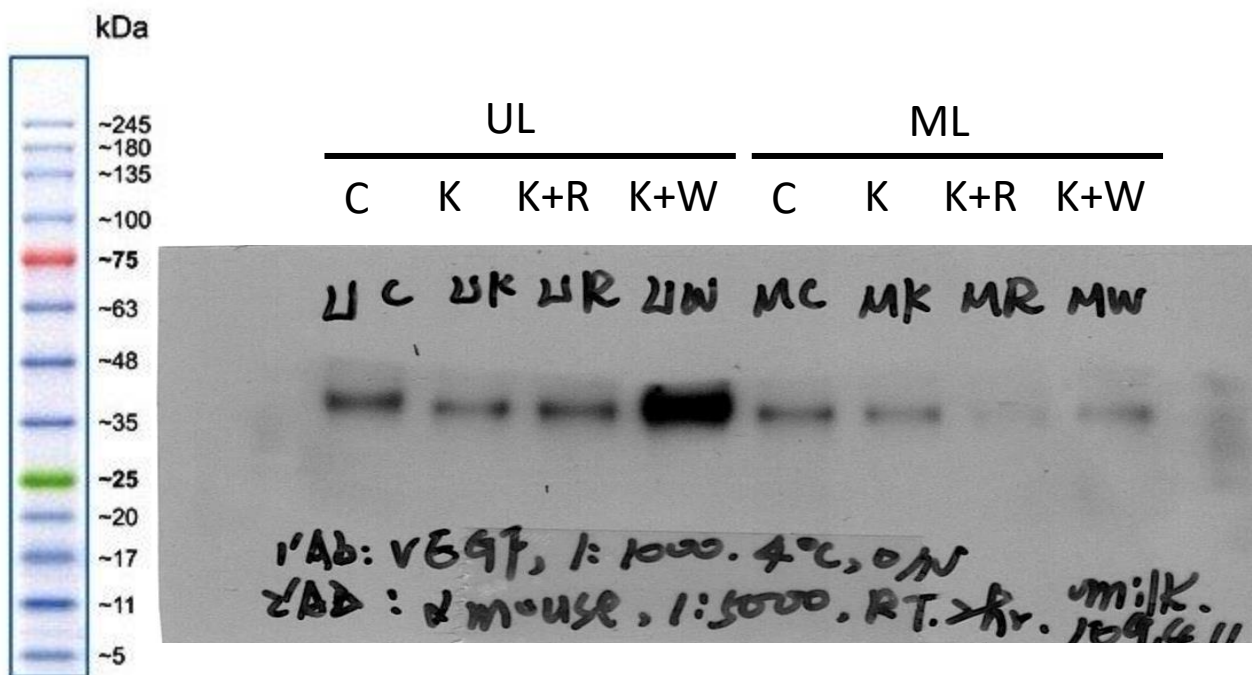

# Western blot

**Protein: VEGF-R1**

**1<sup>o</sup> Ab:** Abcam, rabbit monoclonal IgG

Catalog number: no.ab32152

Molecular weight (kDa):150 kDa

Working concentration: 1:1000

Gel (%): 8%

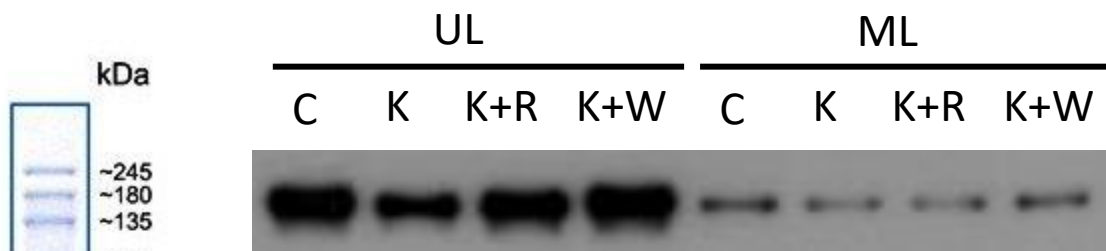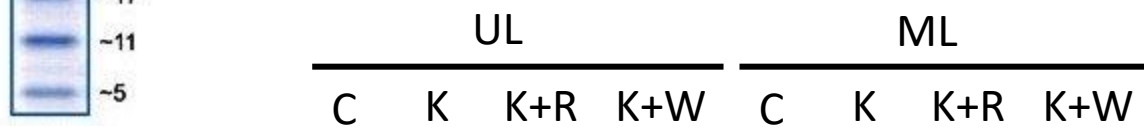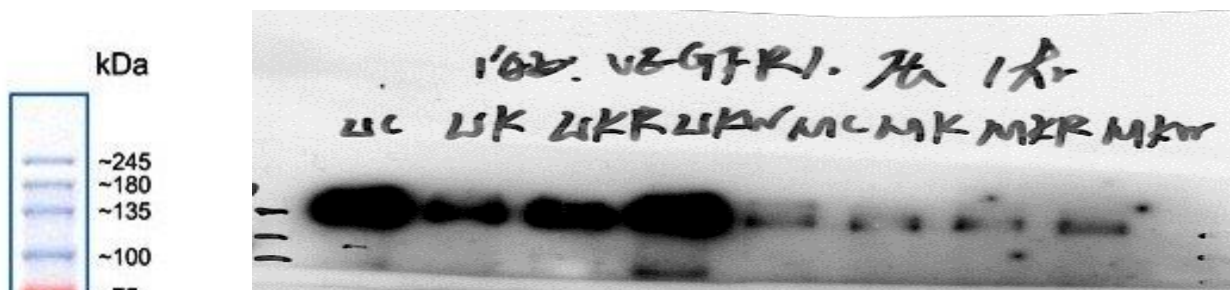

# Western blot

**Protein: VEGF-R1**

**1<sup>o</sup> Ab:** Abcam, rabbit monoclonal IgG

Catalog number: no.ab32152

Molecular weight (kDa):150 kDa

Working concentration: 1:1000

Gel (%): 8%

UL

ML

C

K

K+R

K+W

C

K

K+R

K+W

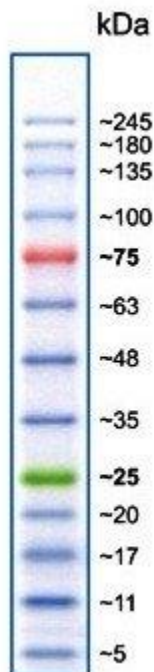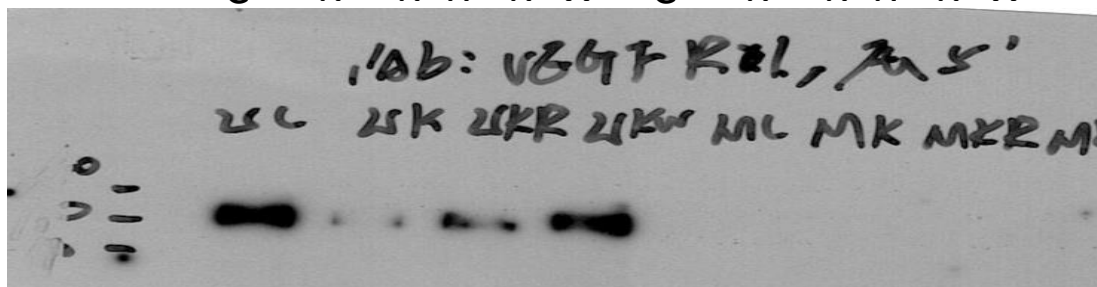

UL

ML

C

K

K+R

K+W

C

K

K+R

K+W

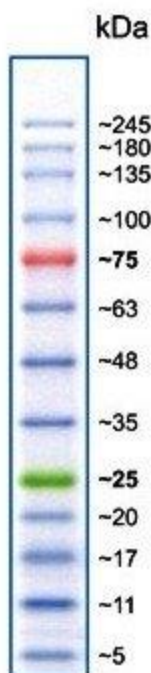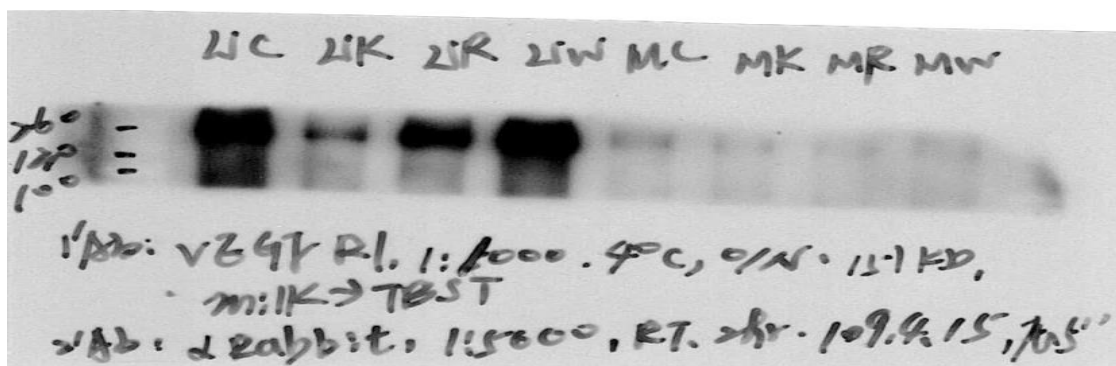



# Western blot

**Protein: VEGF-R2**

**1<sup>o</sup> Ab:** Cell Signaling, rabbit monoclonal IgG

Catalog number: no.#9698

Molecular weight (kDa):220 kDa

Working concentration: 1:1000

Gel (%): 8%

UL

ML

C K K+R K+W C K K+R K+W

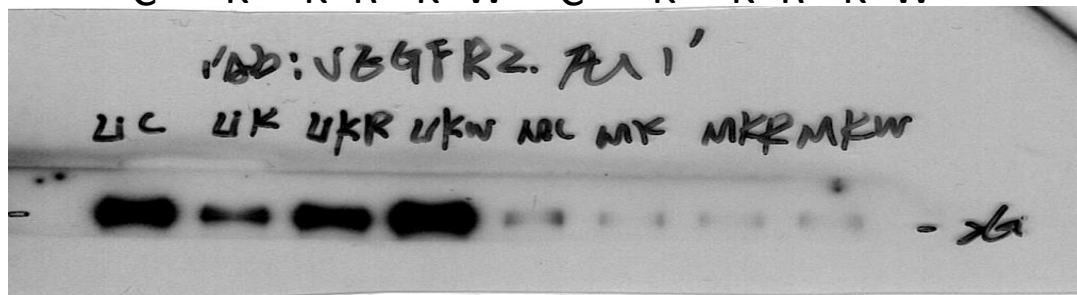

UL

ML

C K K+R K+W C K K+R K+W

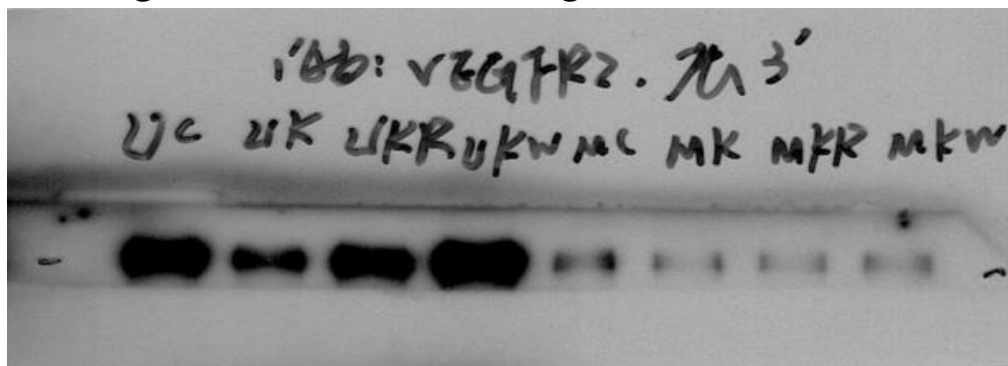

# Western blot

**Protein: VEGF-R2**

**1<sup>o</sup> Ab:** Cell Signaling, rabbit monoclonal IgG

Catalog number: no.#9698

Molecular weight (kDa):220 kDa

Working concentration: 1:1000

Gel (%): 8%

UL

ML

C K K+R K+W C K K+R K+W

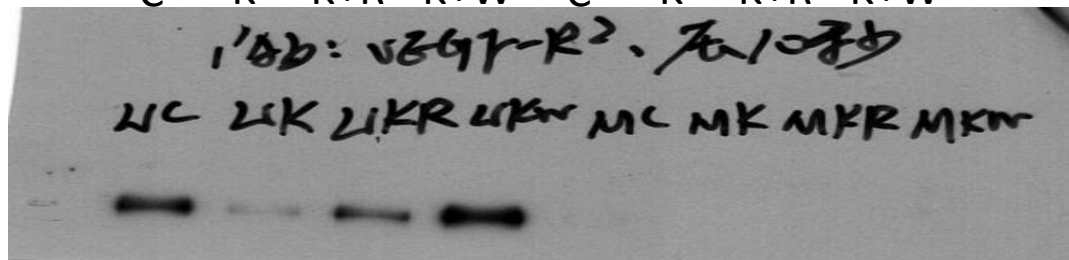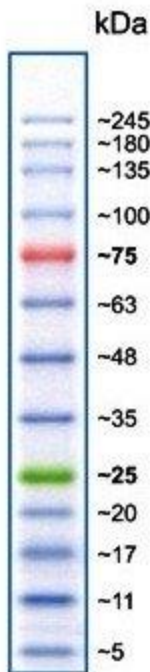

UL

ML

C K K+R K+W C K K+R K+W

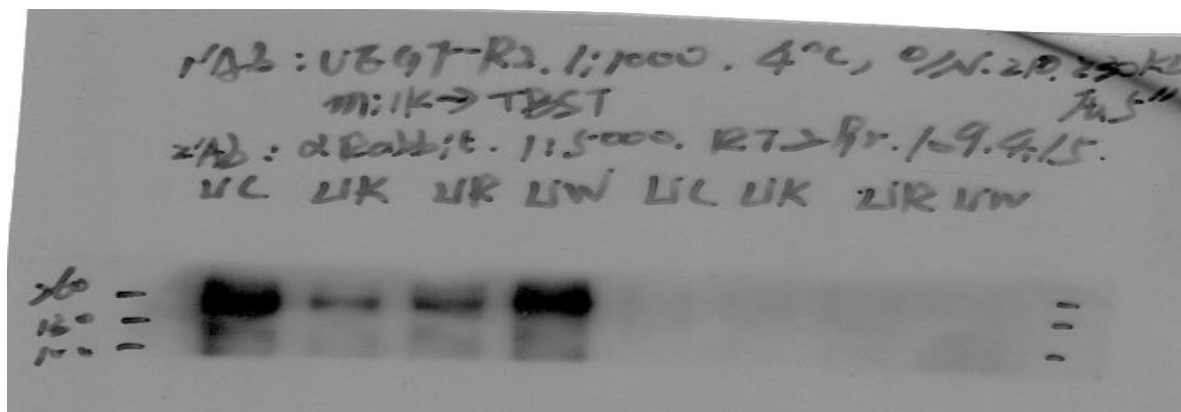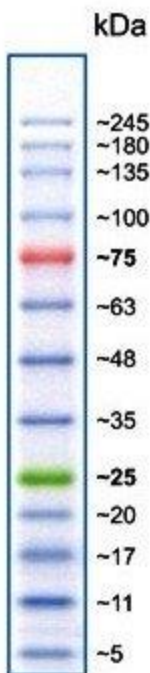

# Western blot

Protein: Laminin

1<sup>o</sup> Ab: Abcam, rabbit monoclonal IgG

Catalog number: no.ab11575

Molecular weight (kDa): 200~400 kDa

Working concentration: 1:1000

Gel (%): 8%

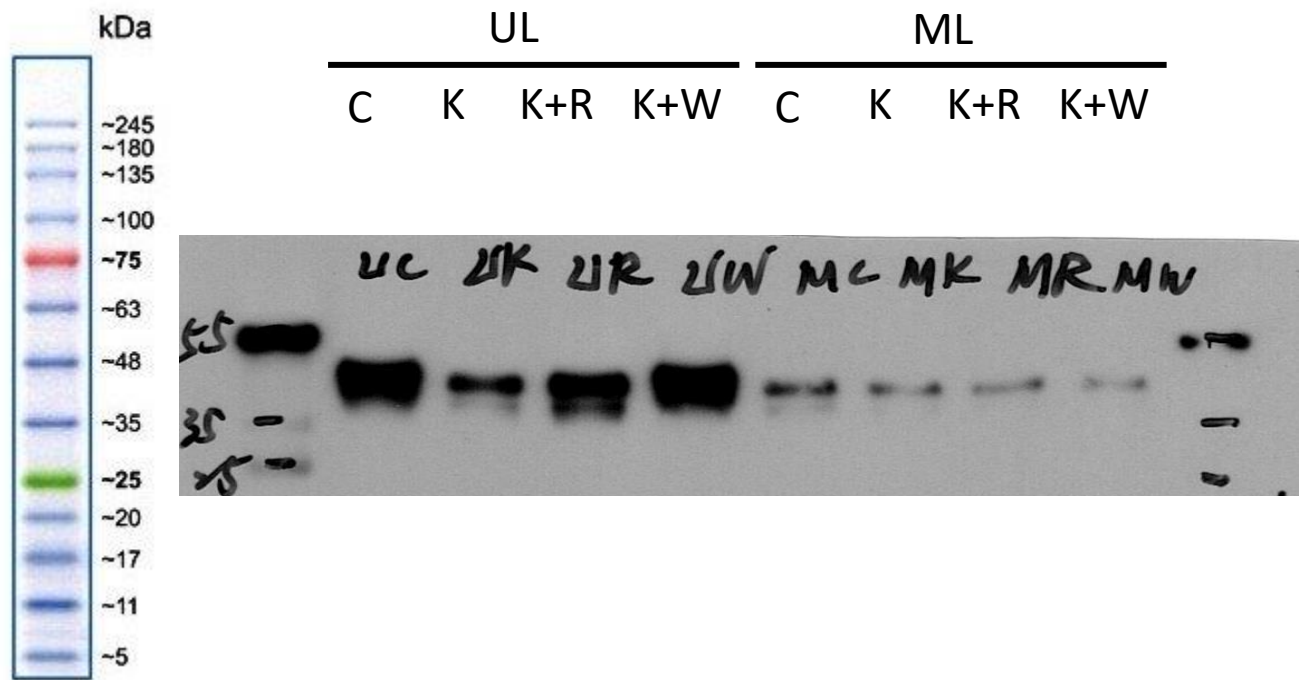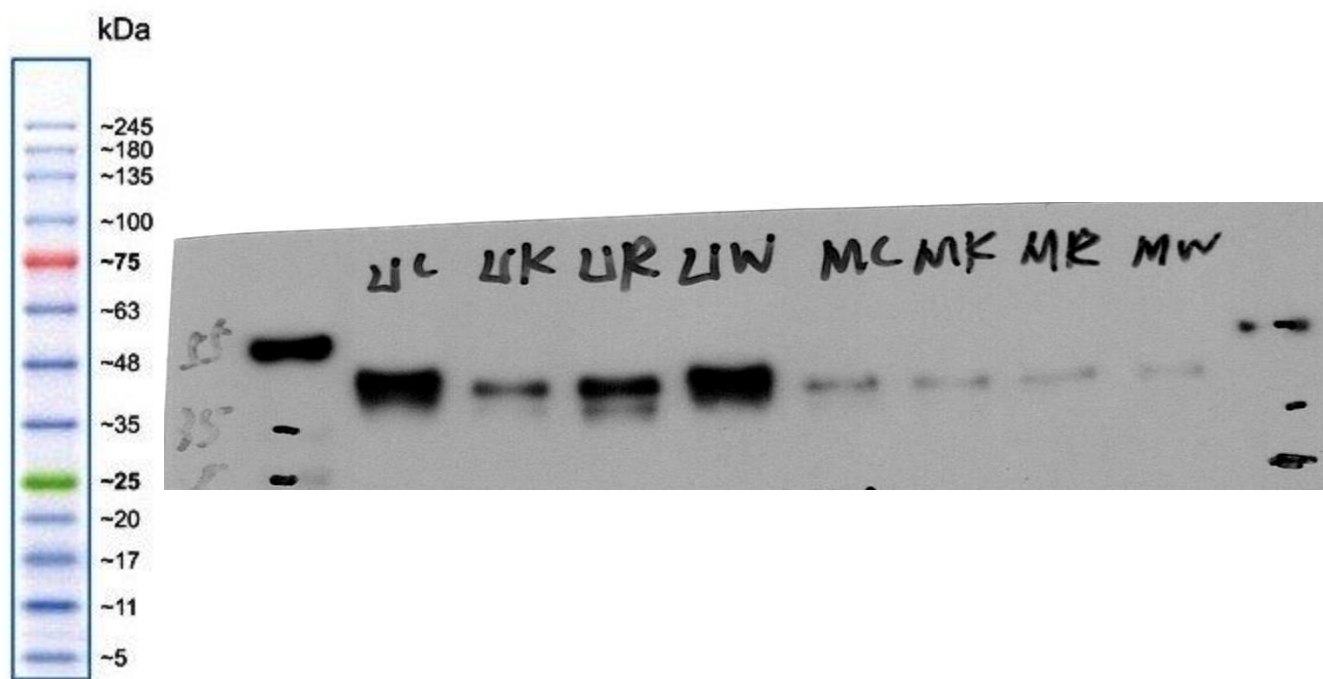

# Western blot

Protein: Laminin

1<sup>o</sup> Ab: Abcam, rabbit monoclonal IgG

Catalog number: no.ab11575

Molecular weight (kDa): 200~400 kDa

Working concentration: 1:1000

Gel (%): 8%

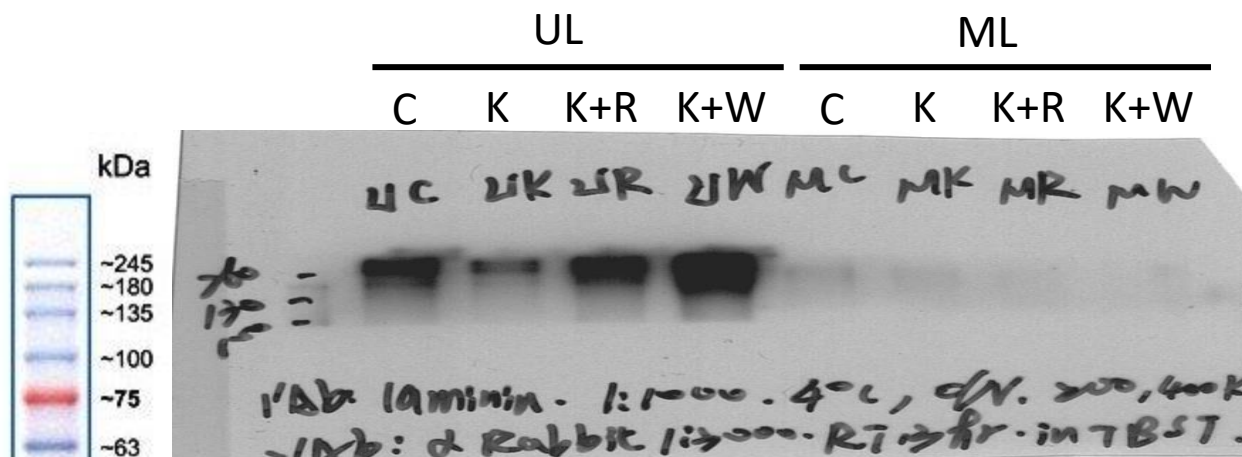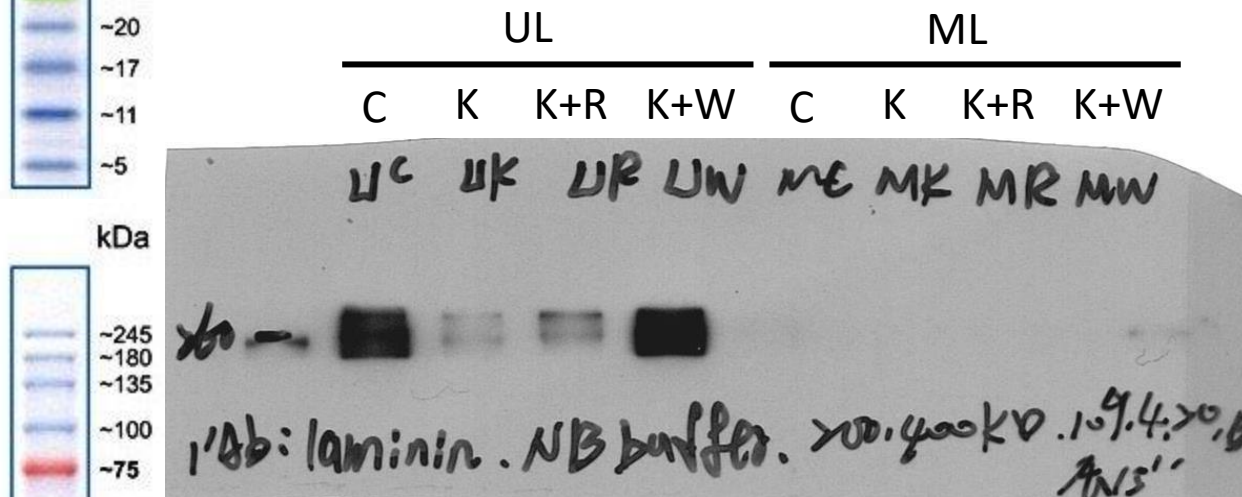



# Western blot

Protein: Laminin

1<sup>o</sup> Ab: Abcam, rabbit monoclonal IgG

Catalog number: no.ab11575

Molecular weight (kDa): 200~400 kDa

Working concentration: 1:1000

Gel (%): 8%

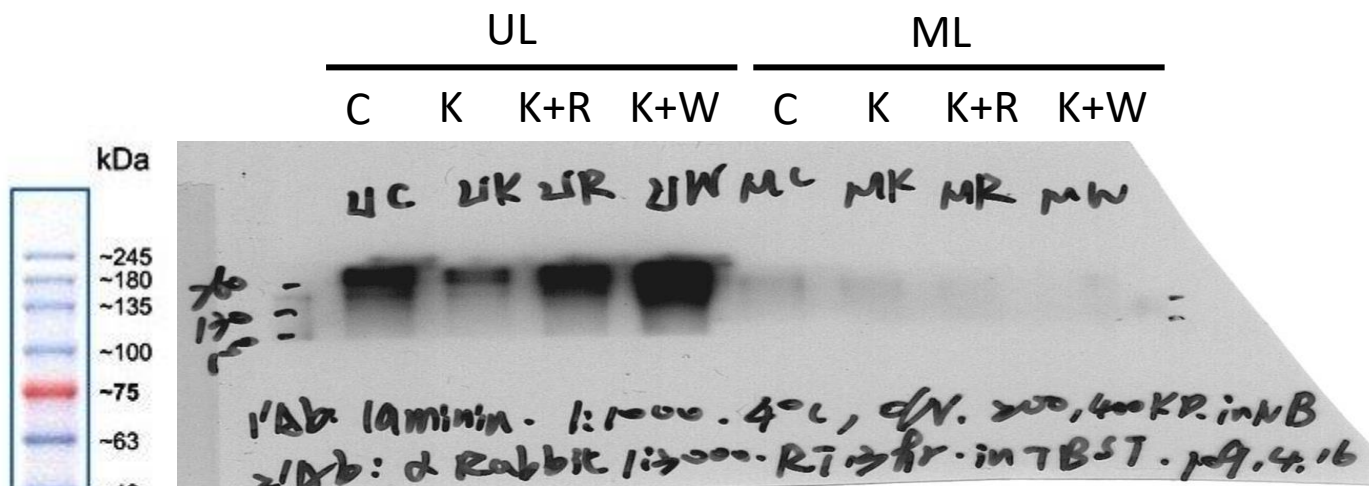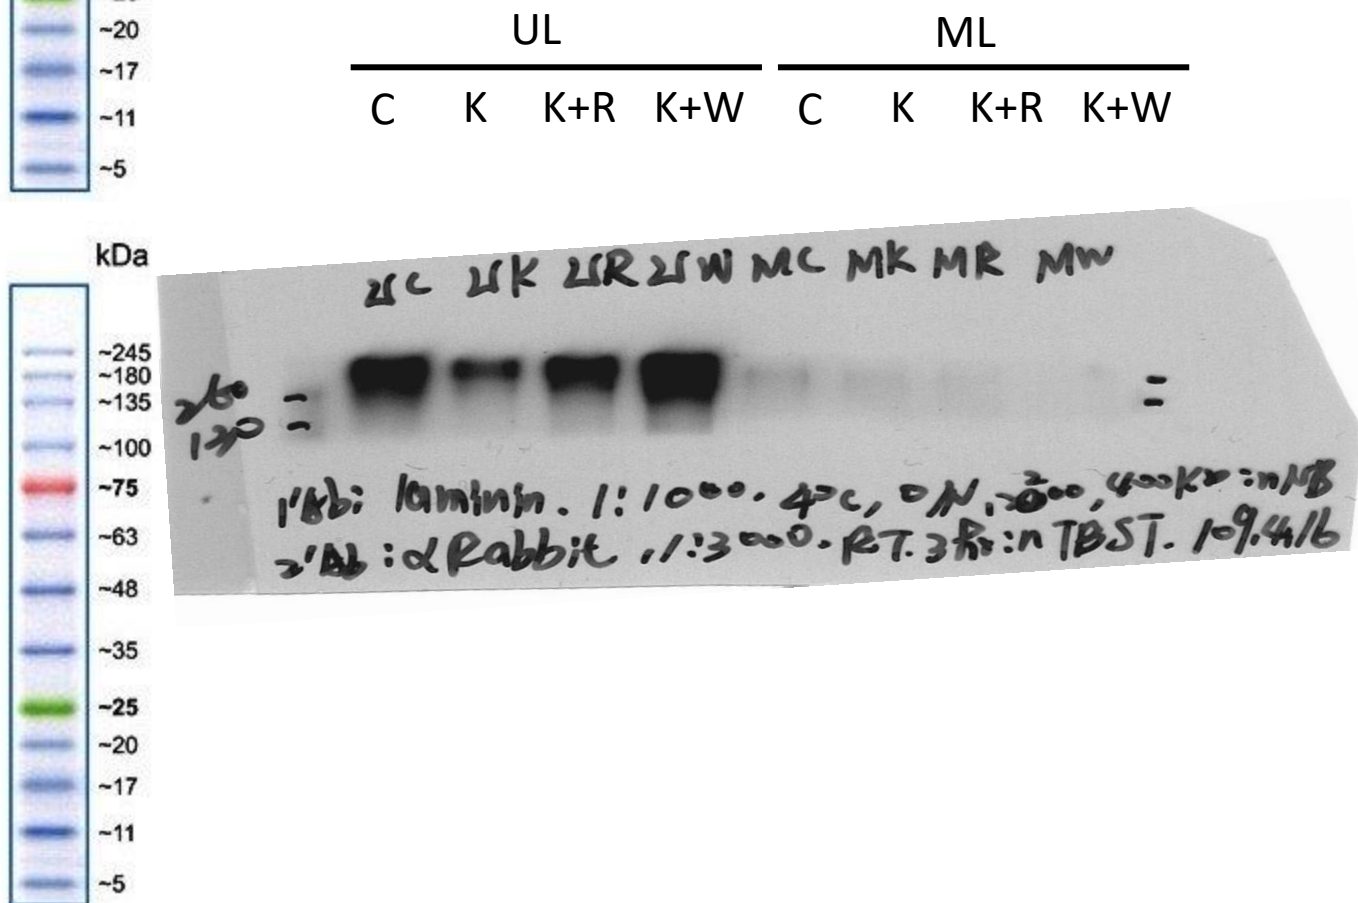

# Western blot

**Protein: Integrin- $\alpha$ 6**

**1<sup>o</sup> Ab:** Abcam, rabbit monoclonal IgG

Catalog number: no.ab181551

Molecular weight (kDa):127 kDa

Working concentration: 1:5000

Gel (%): 8%

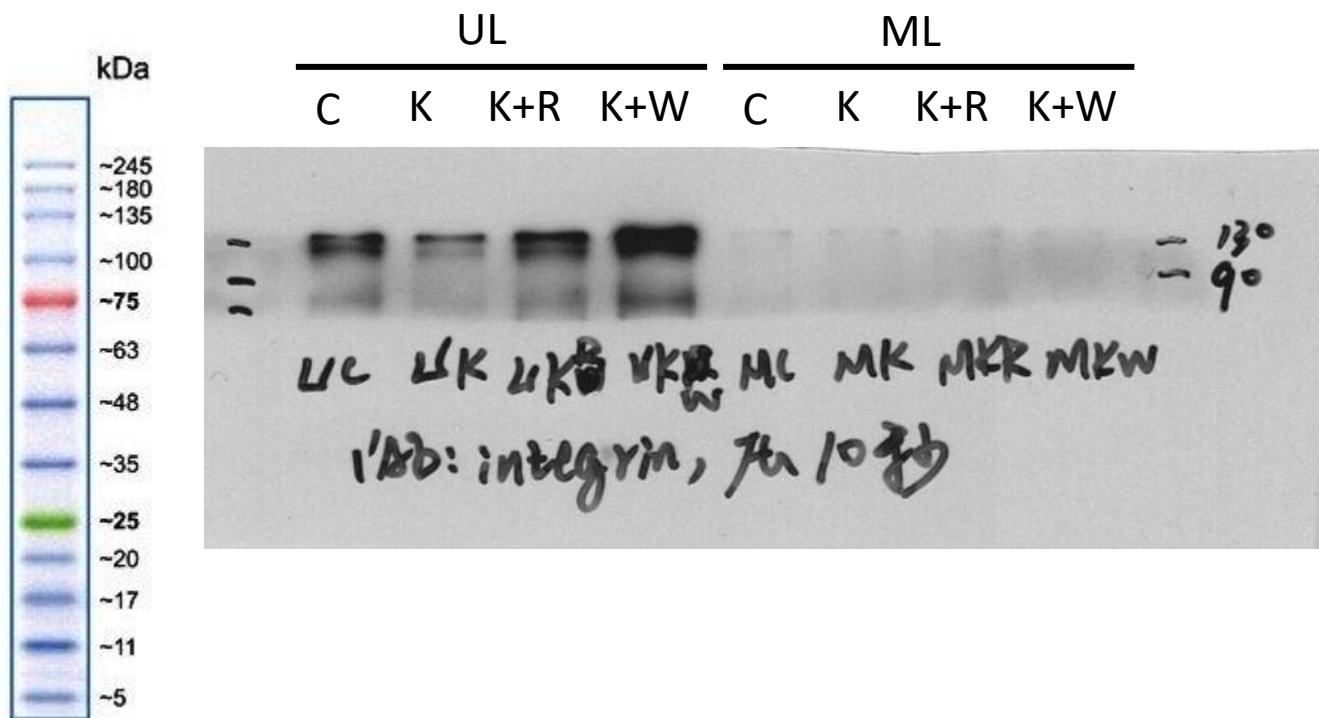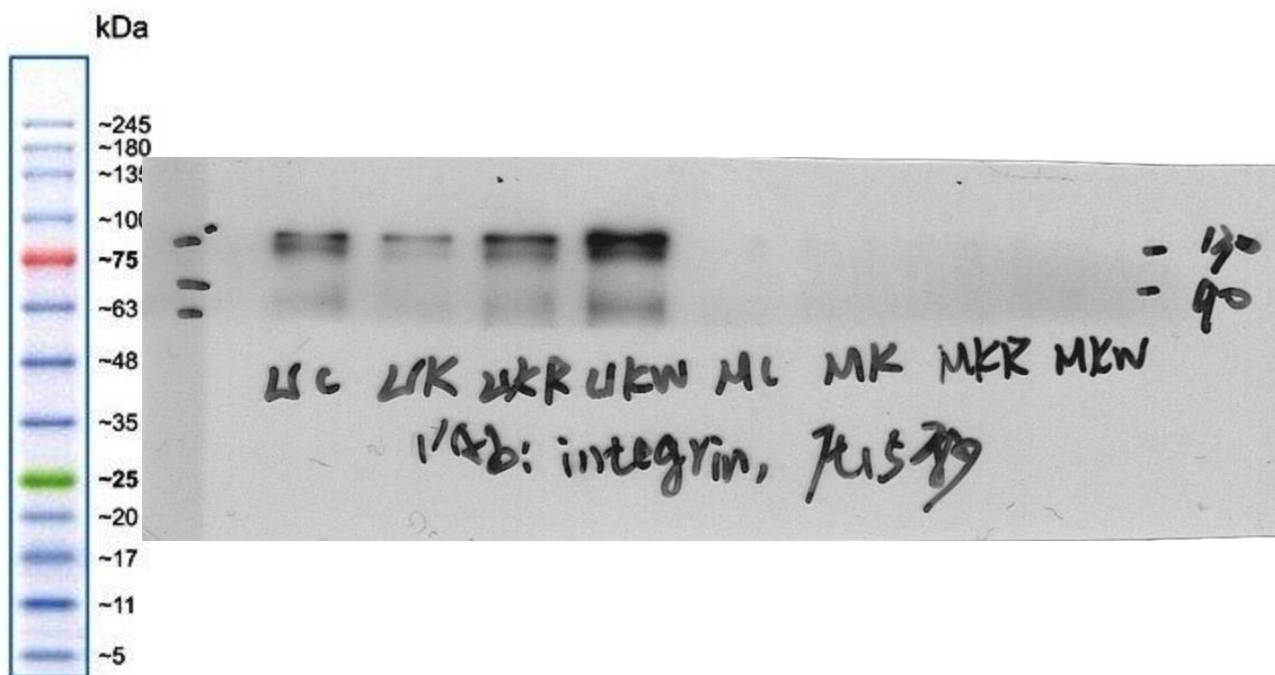



# Western blot

**Protein: Integrin- $\alpha$ 6**

**1<sup>o</sup> Ab:** Abcam, rabbit monoclonal IgG

Catalog number: no.ab181551

Molecular weight (kDa):127 kDa

Working concentration: 1:5000

Gel (%): 8%

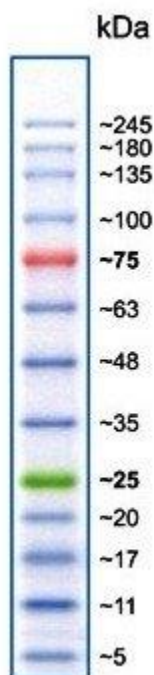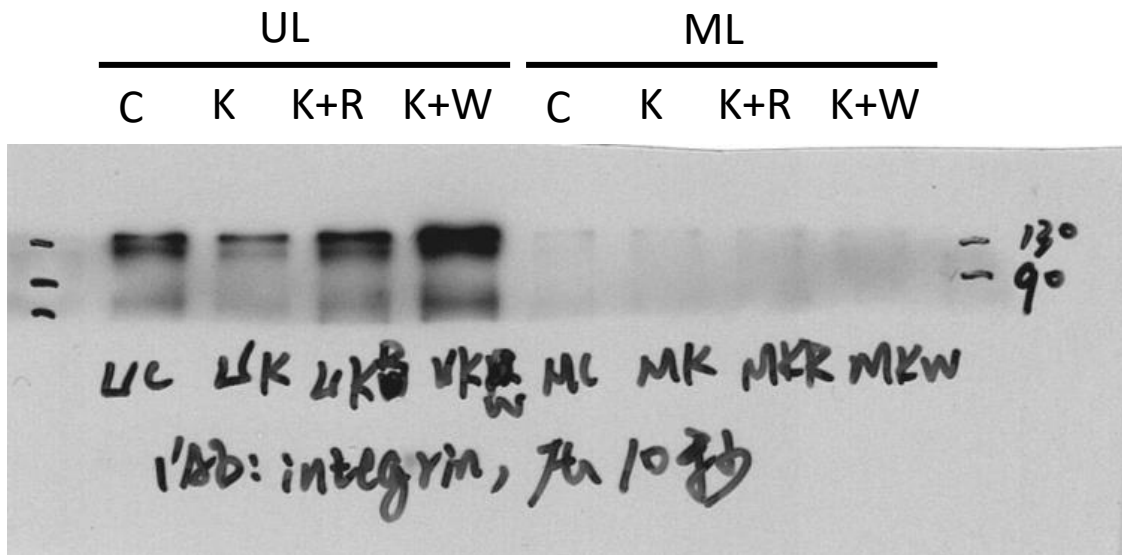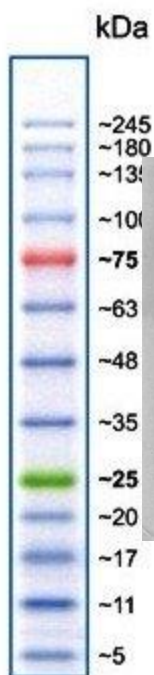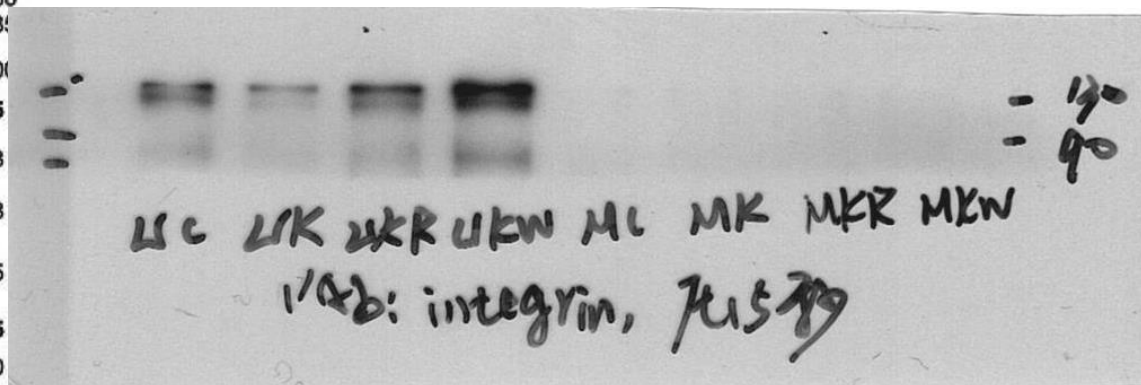

# Western blot

**Protein: Integrin- $\alpha$ 6**

**1<sup>o</sup> Ab:** Abcam, rabbit monoclonal IgG

Catalog number: no.ab181551

Molecular weight (kDa):127 kDa

Working concentration: 1:5000

Gel (%): 8%

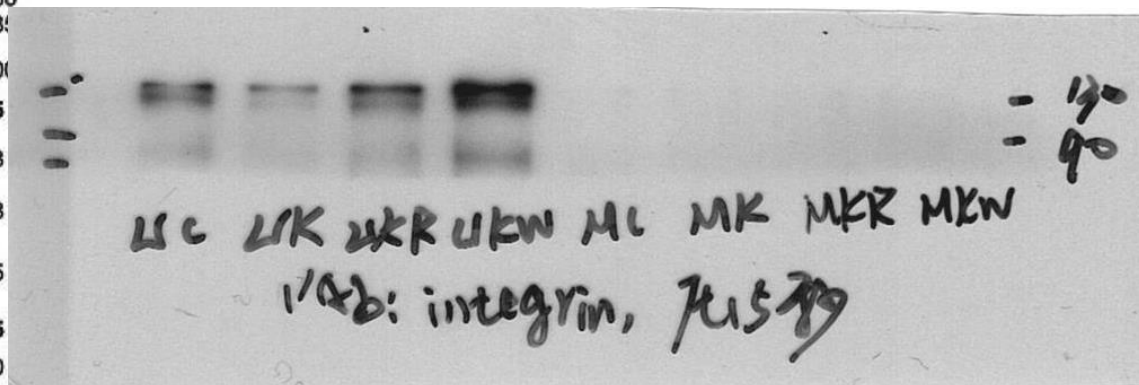

# Western blot

Protein: GAPDH

1<sup>o</sup> Ab: Millipore, mouse monoclonal IgG1

Catalog number: no. MAB374

Molecular weight (kDa):36 kDa

Working concentration: 1:1000

Gel (%): 8%

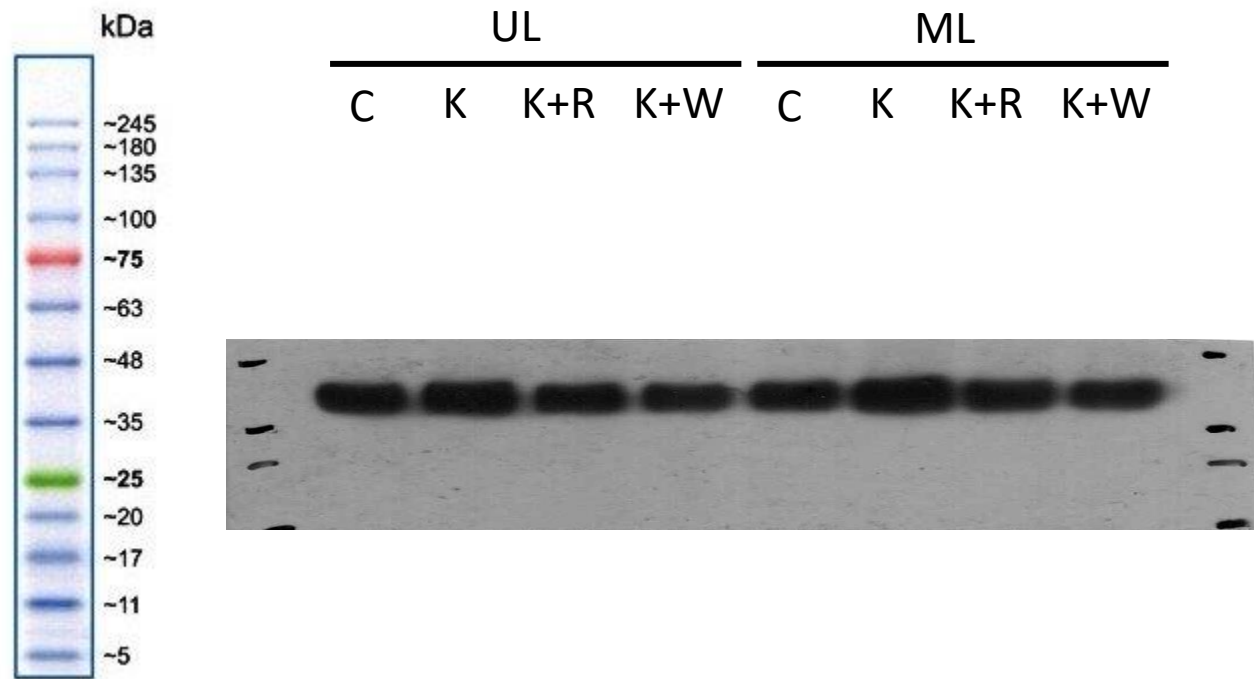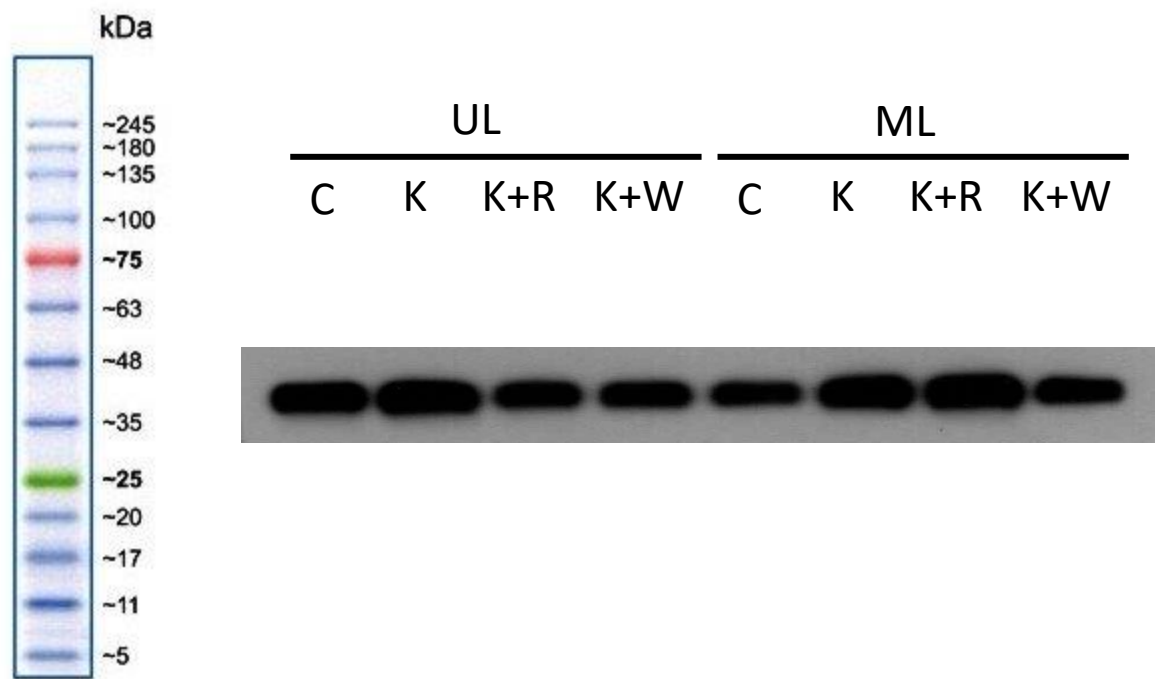

# Western blot

**Protein: Erk1/2 (p44/42)** **1<sup>o</sup> Ab:** Cell Signaling, rabbit monoclonal IgG

Catalog number: no.#9102

Molecular weight (kDa):42~44 kDa

Working concentration: 1:1000

Gel (%): 8%

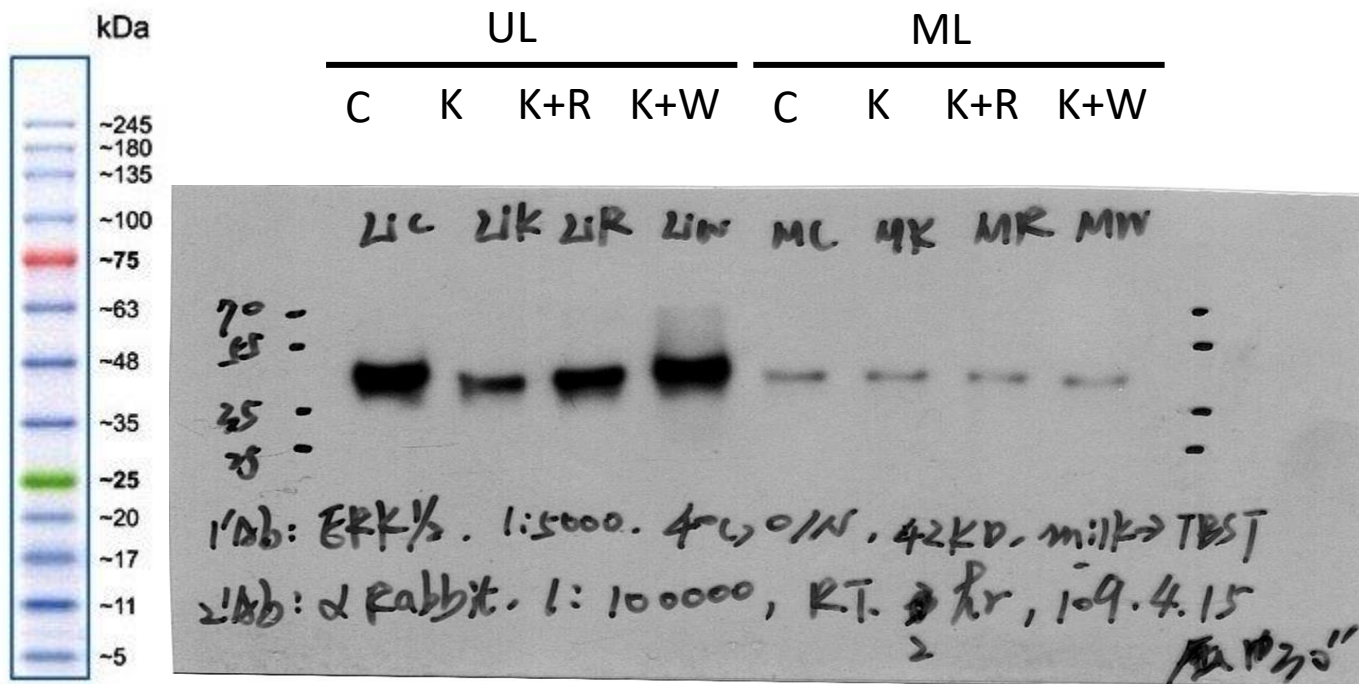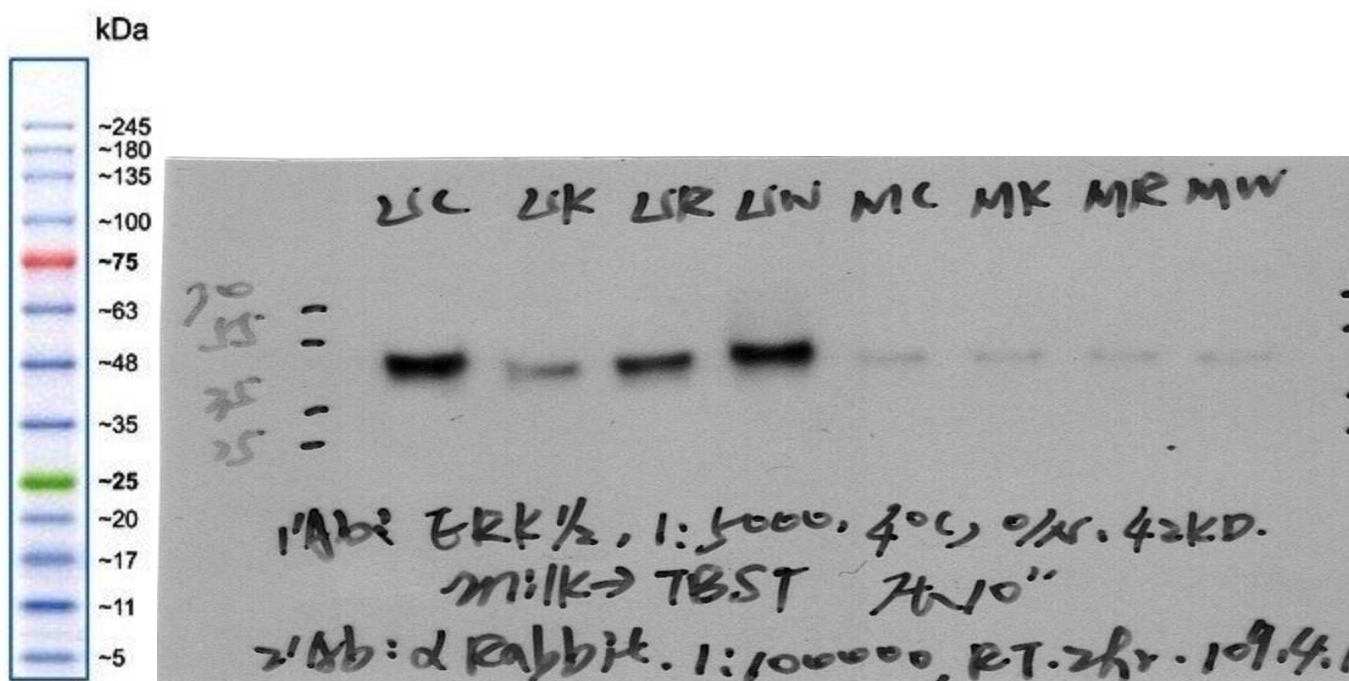



# Western blot

**Protein: Erk1/2 (p44/42)** **1<sup>o</sup> Ab:** Cell Signaling, rabbit monoclonal IgG

Catalog number: no.#9102

Molecular weight (kDa):42~44 kDa

Working concentration: 1:1000

Gel (%): 8%

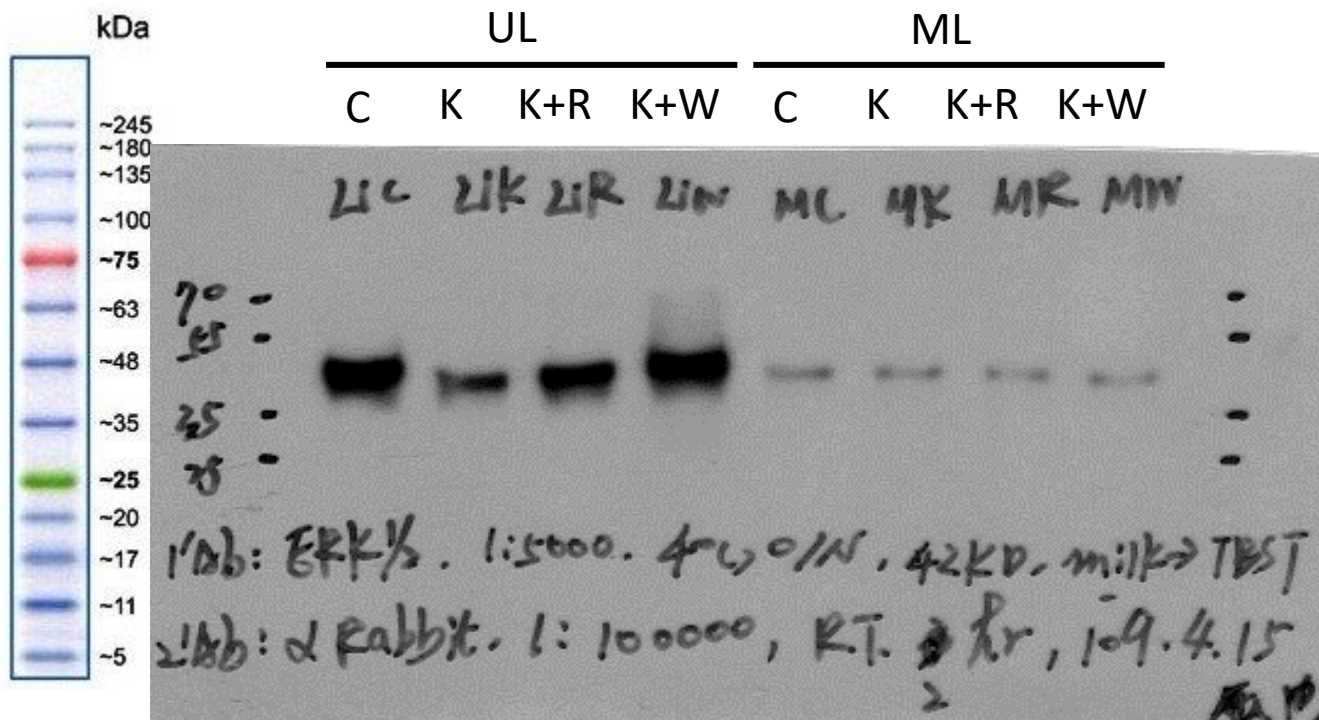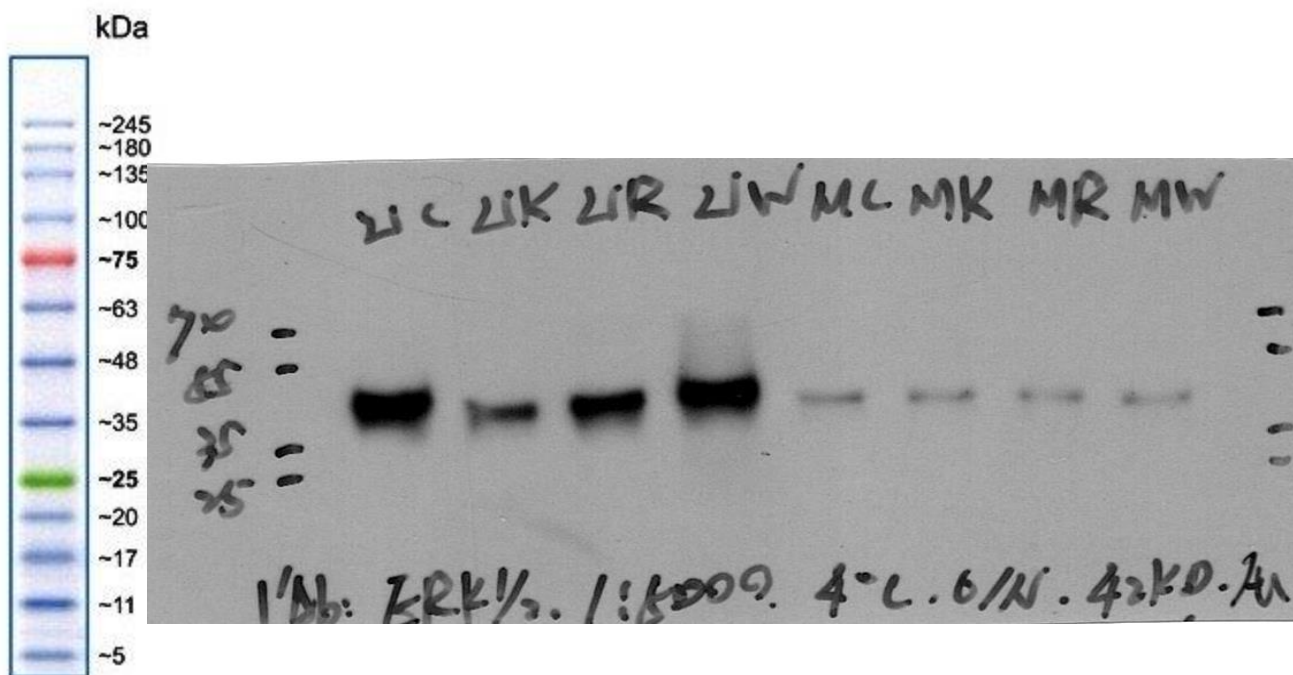



# Western blot

**Protein: Erk1/2 (p44/42)** **1<sup>o</sup> Ab:** Cell Signaling, rabbit monoclonal IgG

Catalog number: no.#9102

Molecular weight (kDa): 42~44 kDa

Working concentration: 1:1000

Gel (%): 8%

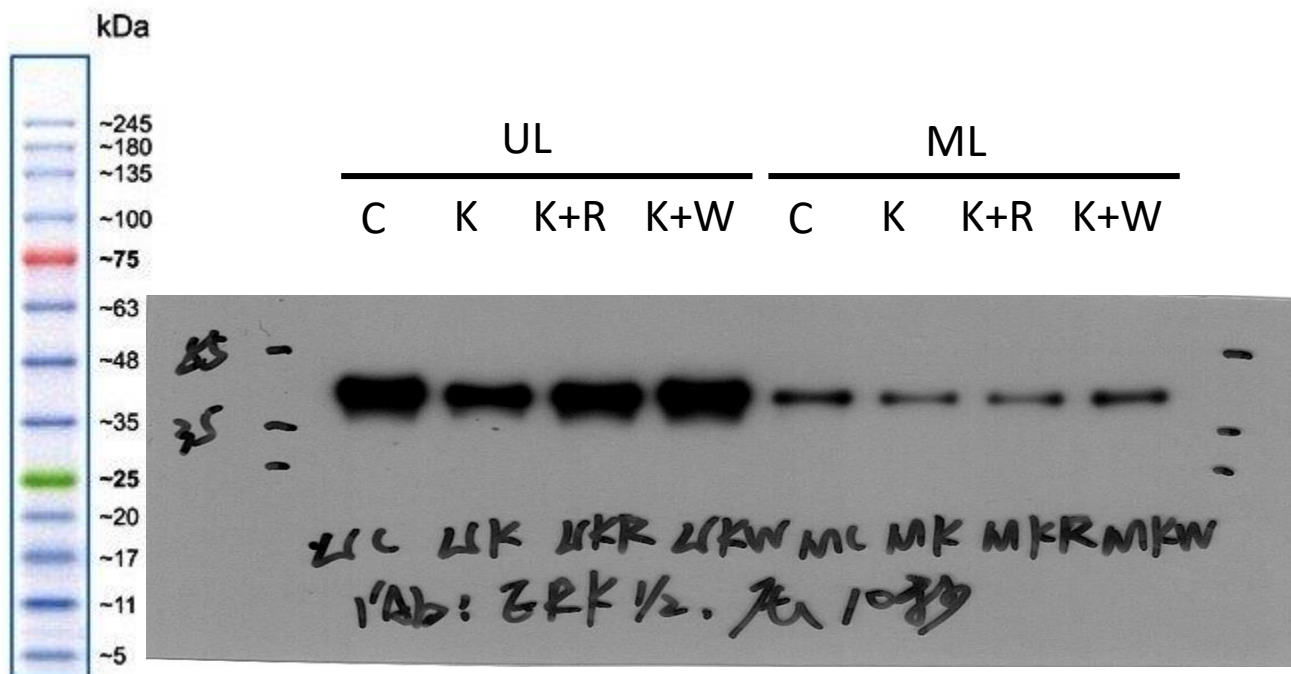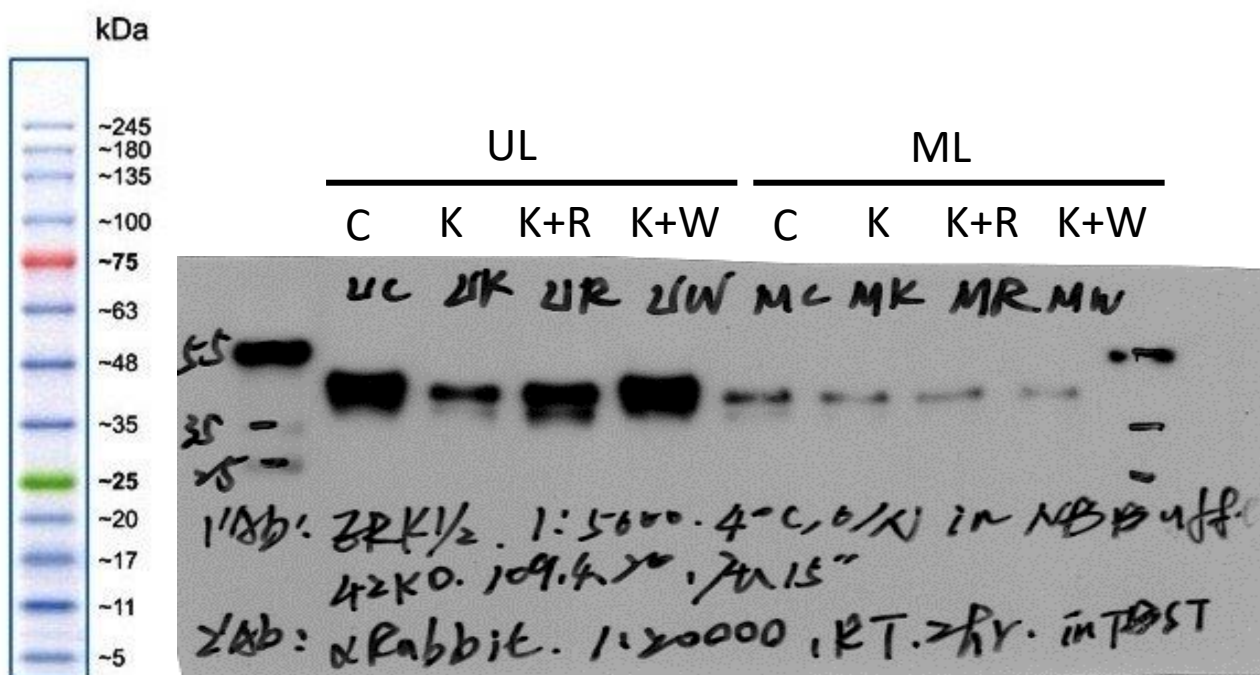

# Western blot

**Protein: Erk1/2 (p44/42)** **1<sup>o</sup> Ab:** Cell Signaling, rabbit monoclonal IgG

Catalog number: no.#9102

Molecular weight (kDa):42~44 kDa

Working concentration: 1:1000

Gel (%): 8%

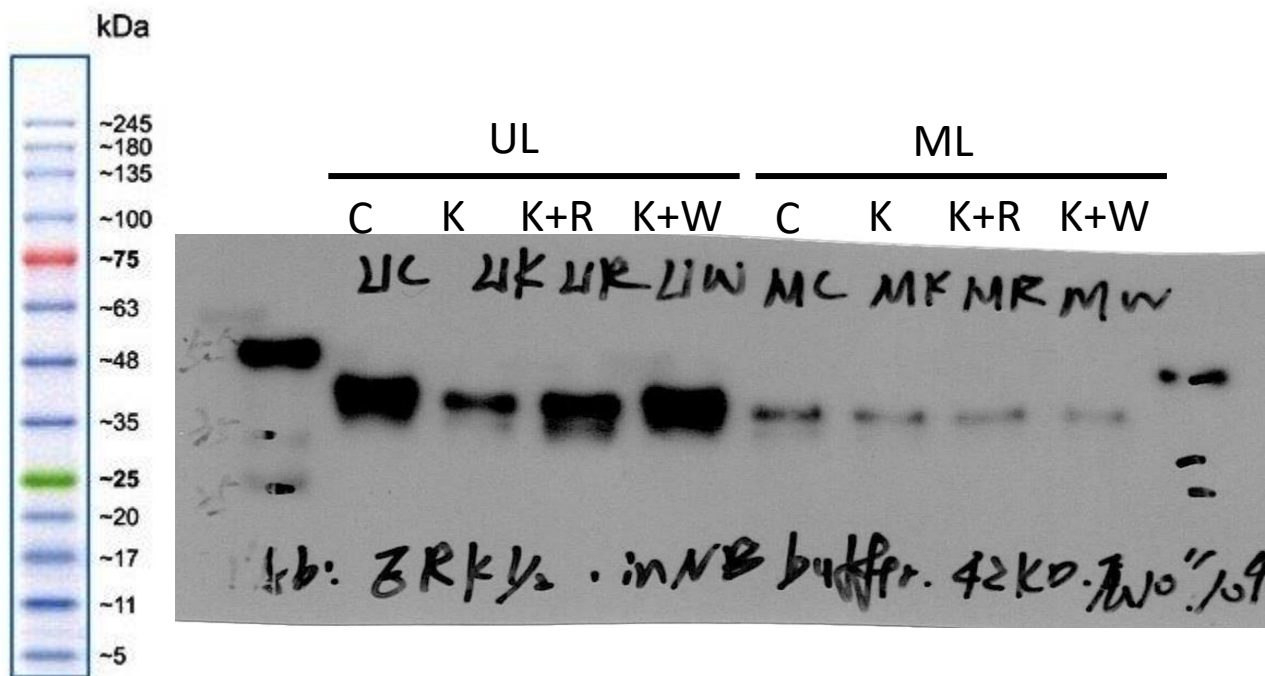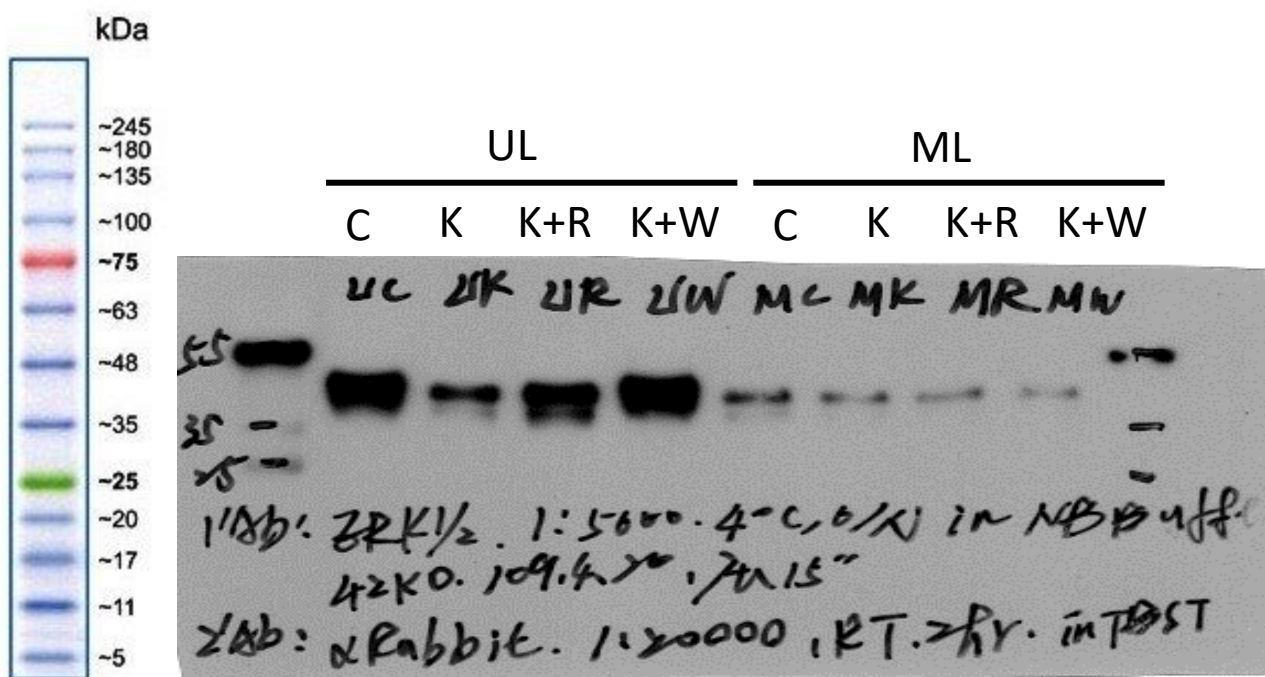

# Western blot

**Protein: p-Erk1/2**

**1<sup>o</sup> Ab:** Cell Signaling, rabbit monoclonal IgG

Catalog number: no.#4370

Molecular weight (kDa): 42~44 kDa

Working concentration: 1:2000

Gel (%): 8%

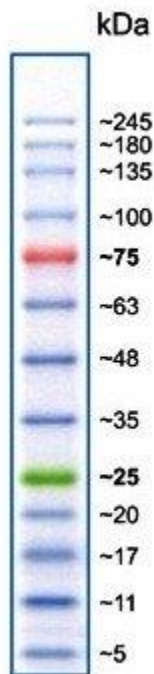

| UL |   |     |     | ML |   |     |     |
|----|---|-----|-----|----|---|-----|-----|
| C  | K | K+R | K+W | C  | K | K+R | K+W |

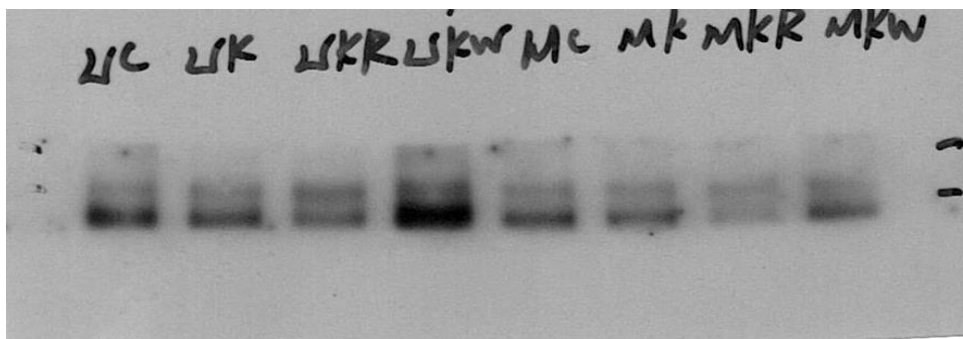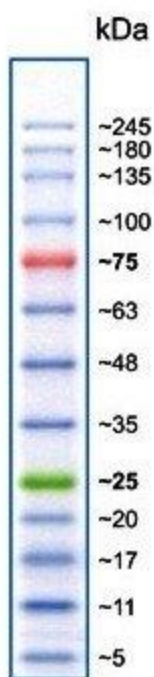

| UL |   |     |     | ML |   |     |     |
|----|---|-----|-----|----|---|-----|-----|
| C  | K | K+R | K+W | C  | K | K+R | K+W |

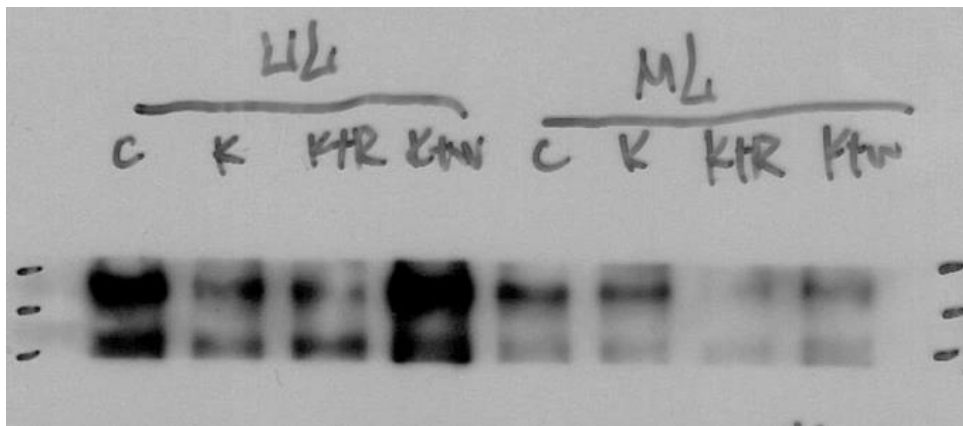

# Western blot

**Protein: P38**

**1<sup>o</sup> Ab:** Cell Signaling, rabbit monoclonal IgG

Catalog number: no.#8690

Molecular weight (kDa): 38~40 kDa

Working concentration: 1:1000

Gel (%): 8%

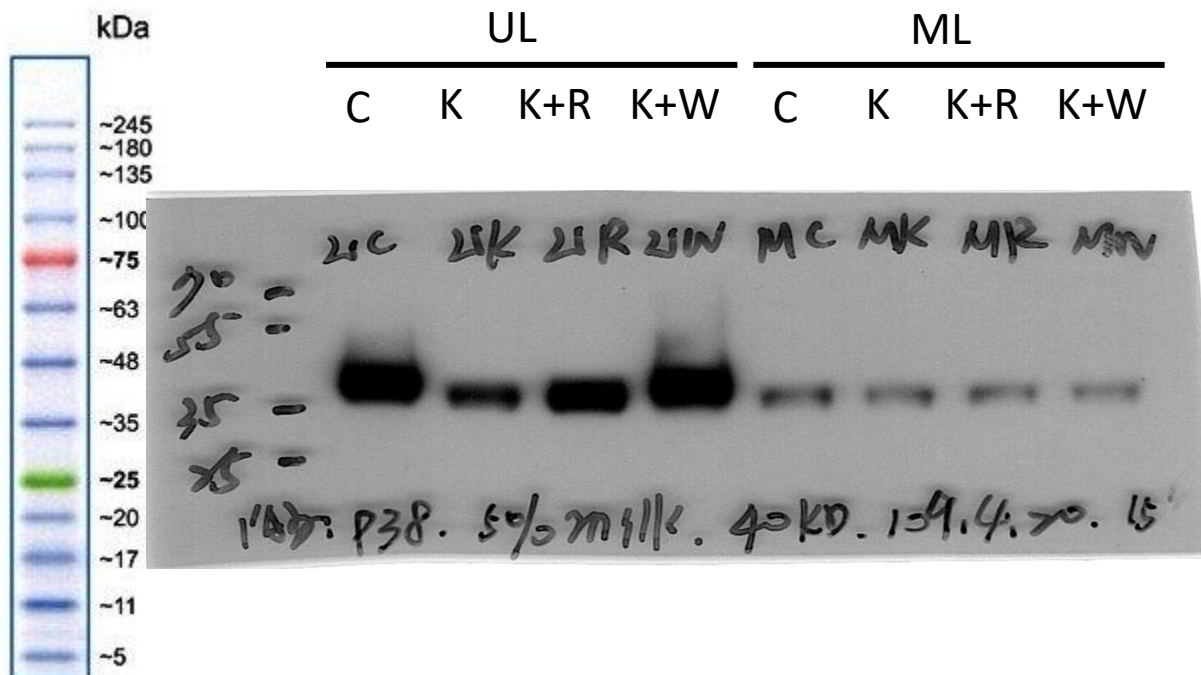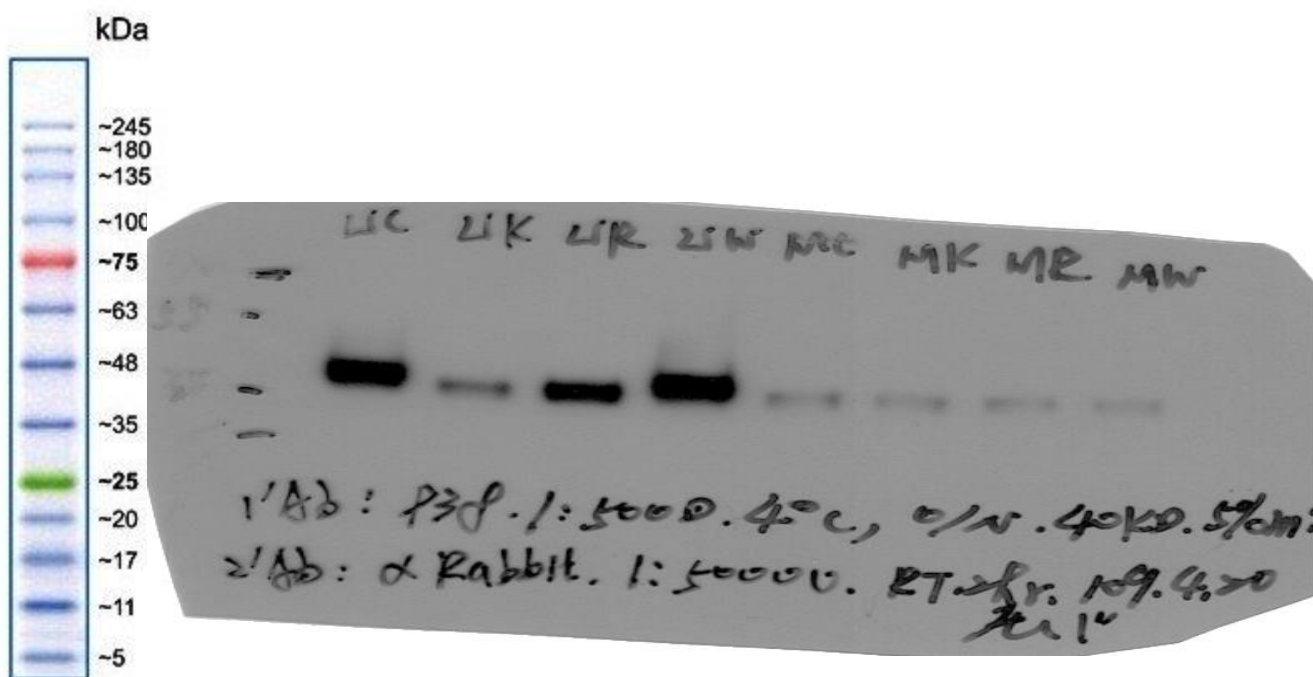



# Western blot

**Protein: P38**

**1<sup>o</sup> Ab:** Cell Signaling, rabbit monoclonal IgG

Catalog number: no.#8690

Molecular weight (kDa): 38~40 kDa

Working concentration: 1:1000

Gel (%): 8%

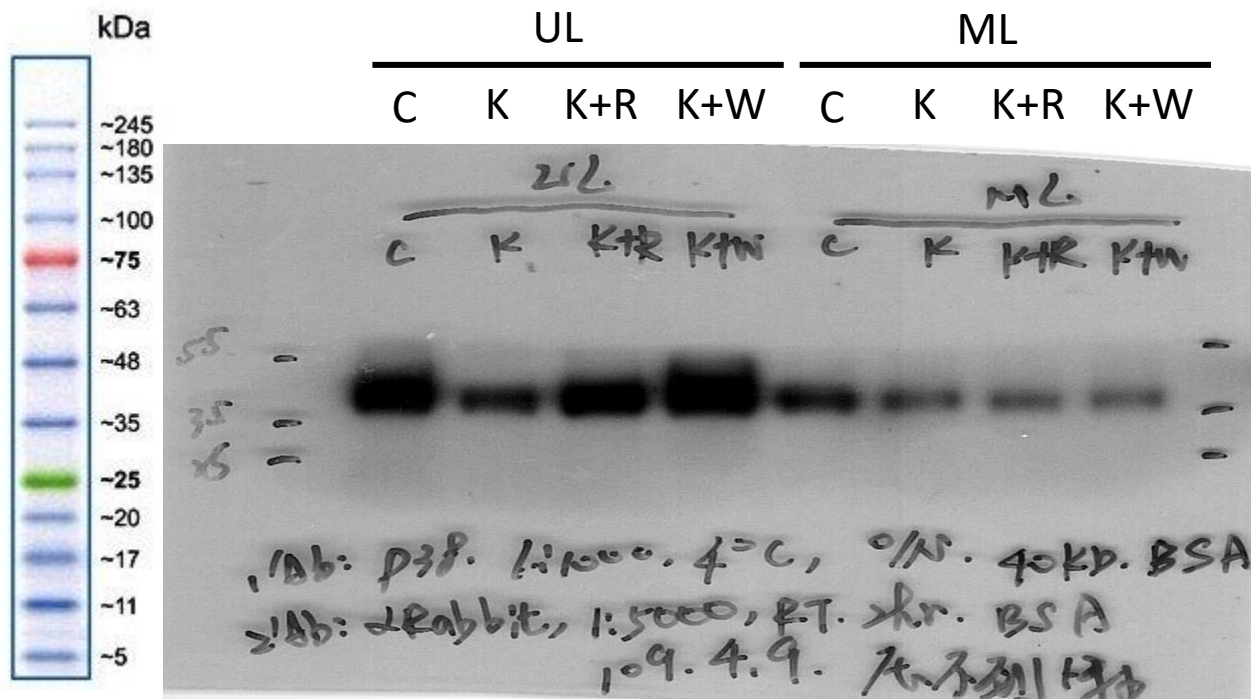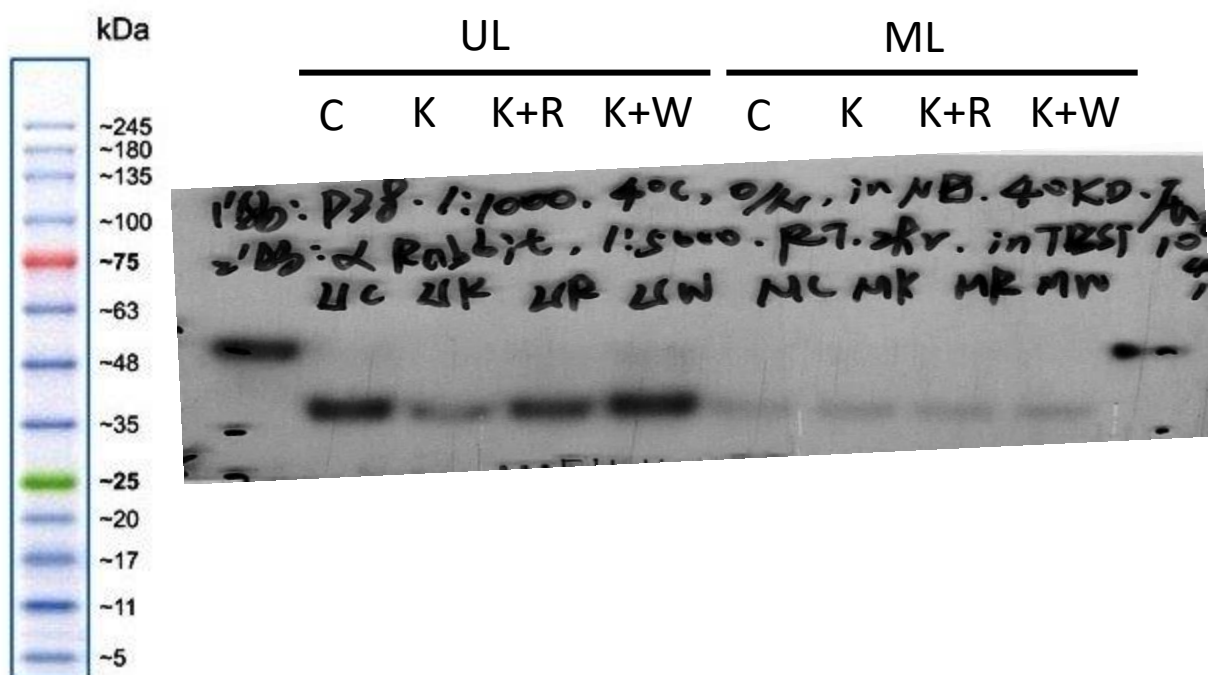



# Western blot

**Protein: p-P38**

**1<sup>o</sup> Ab:** Cell Signaling, rabbit monoclonal IgG

Catalog number: no.#4511

Molecular weight (kDa): 38~40 kDa

Working concentration: 1:1000

Gel (%): 8%



| UL |   |     |     | ML |   |     |     |
|----|---|-----|-----|----|---|-----|-----|
| C  | K | K+R | K+W | C  | K | K+R | K+W |

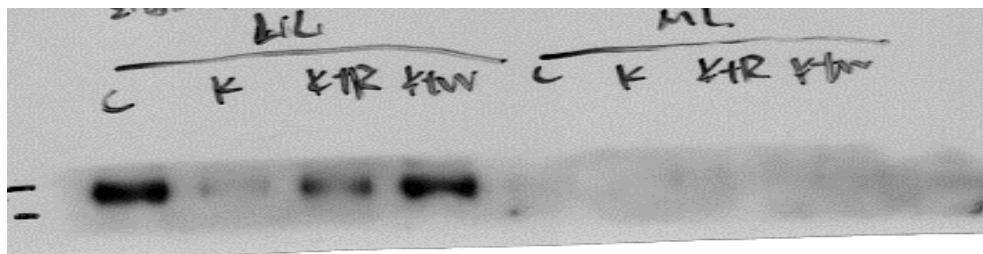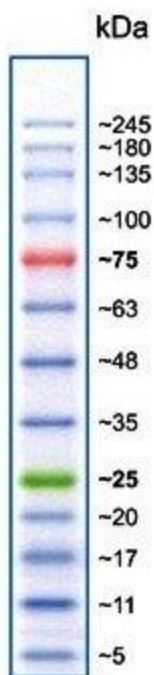

| UL |   |     |     | ML |   |     |     |
|----|---|-----|-----|----|---|-----|-----|
| C  | K | K+R | K+W | C  | K | K+R | K+W |

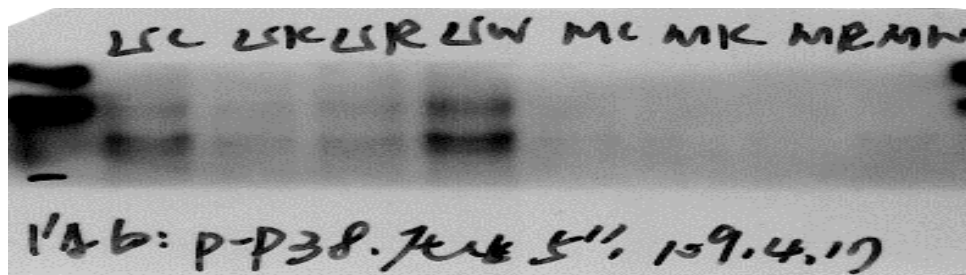

# Western blot

**Protein: p-P38**

**1<sup>o</sup> Ab:** Cell Signaling, rabbit monoclonal IgG

Catalog number: no.#4511

Molecular weight (kDa): 38~40 kDa

Working concentration: 1:1000

Gel (%): 8%



| UL |   |     |     | ML |   |     |     |
|----|---|-----|-----|----|---|-----|-----|
| C  | K | K+R | K+W | C  | K | K+R | K+W |

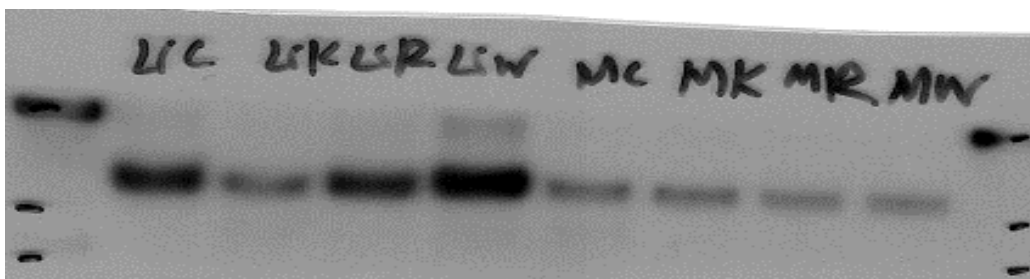

| UL |   |     |     | ML |   |     |     |
|----|---|-----|-----|----|---|-----|-----|
| C  | K | K+R | K+W | C  | K | K+R | K+W |

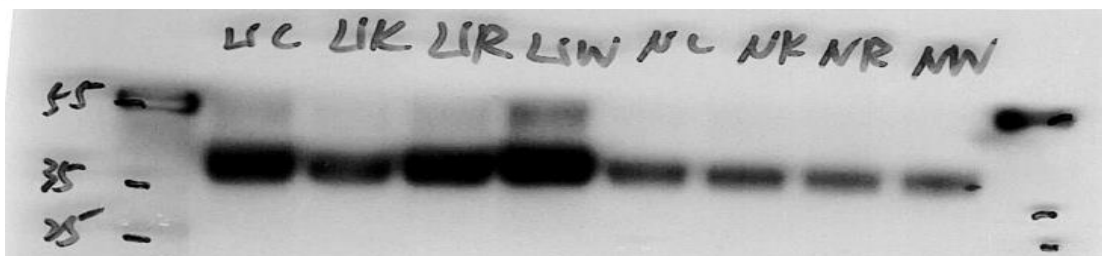

# Western blot

**Protein: Akt**

**1<sup>o</sup> Ab:** Cell Signaling, mouse monoclonal IgG

Catalog number: no.#2920

Molecular weight (kDa):60 kDa

Working concentration: 1:2000

Gel (%): 8%

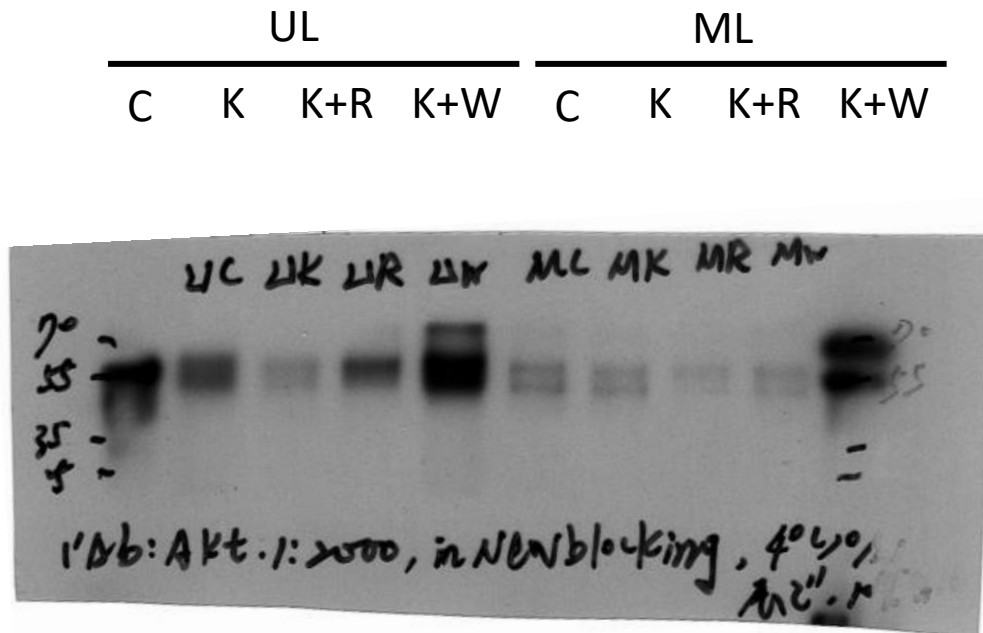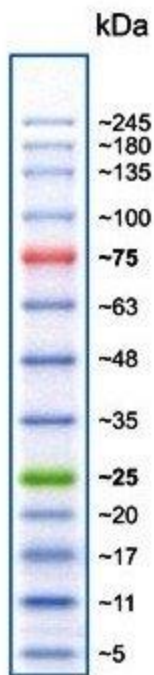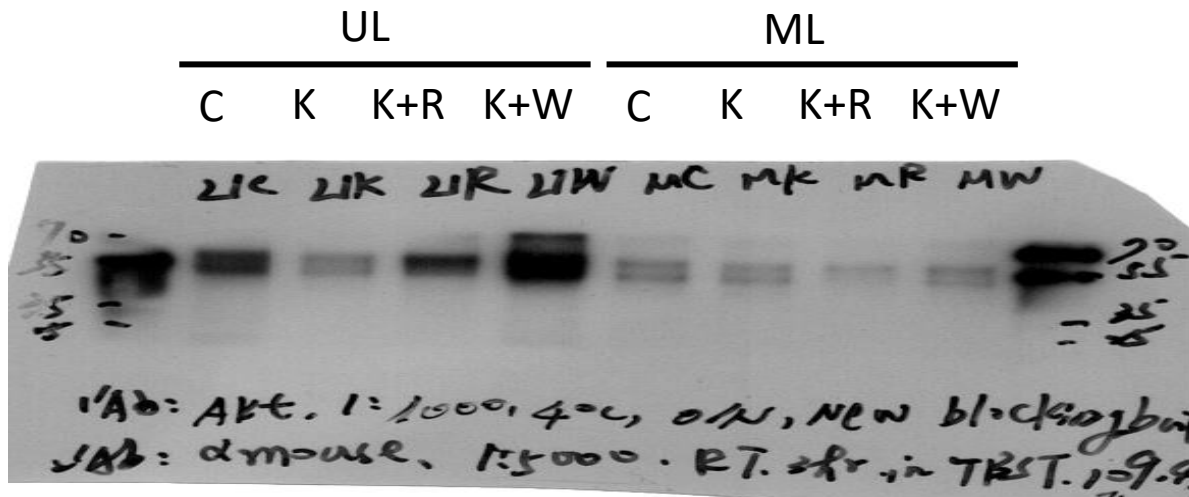

# Western blot

**Protein: Akt**

**1<sup>o</sup> Ab:** Cell Signaling, mouse monoclonal IgG

Catalog number: no.#2920

Molecular weight (kDa):60 kDa

Working concentration: 1:2000

Gel (%): 8%

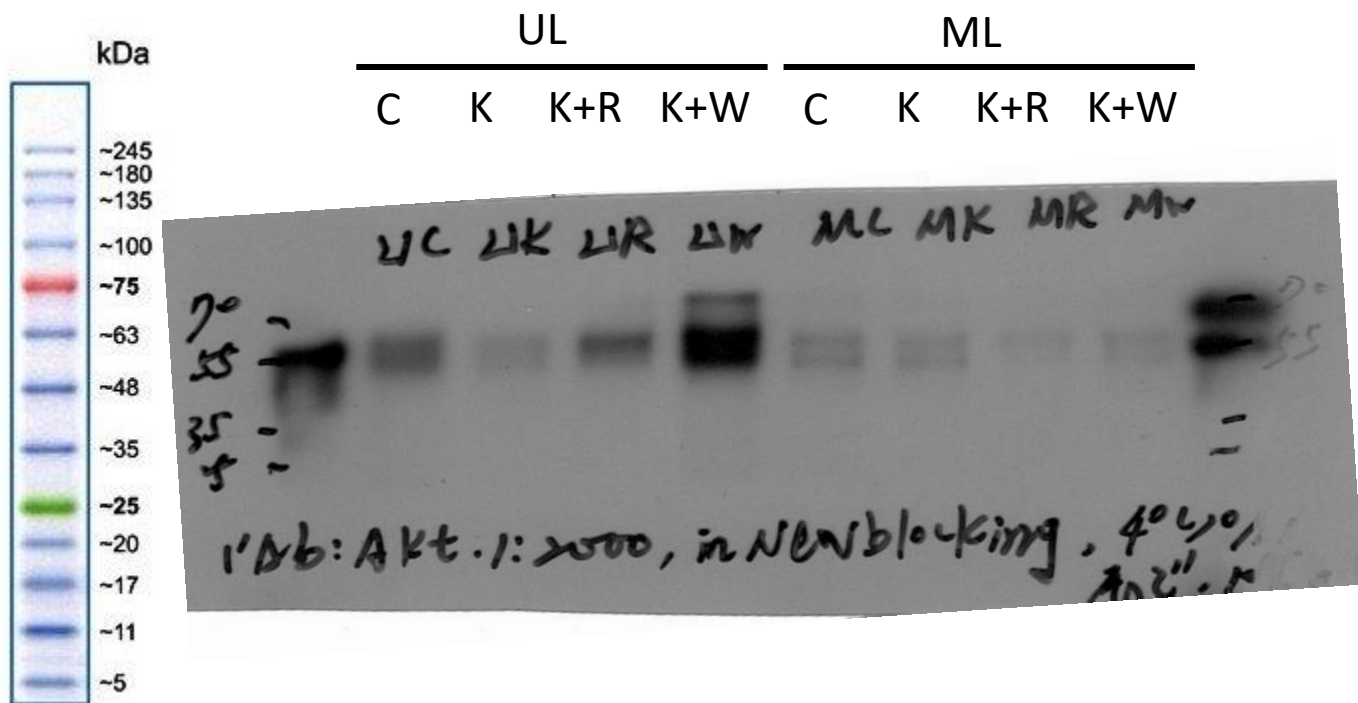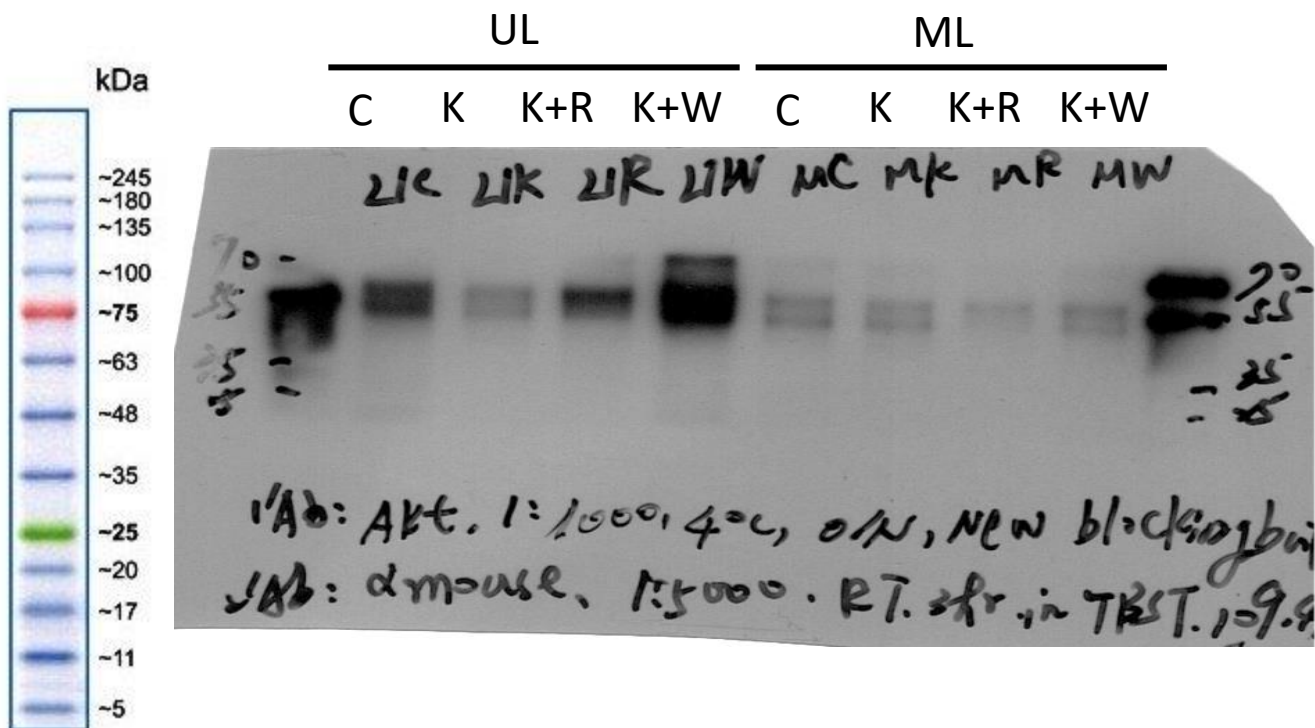



# Western blot

**Protein: p-Akt**

**1<sup>o</sup> Ab:** Cell Signaling, rabbit monoclonal IgG

Catalog number: no.#4060

Molecular weight (kDa):60 kDa

Working concentration: 1:1000

Gel (%): 8%

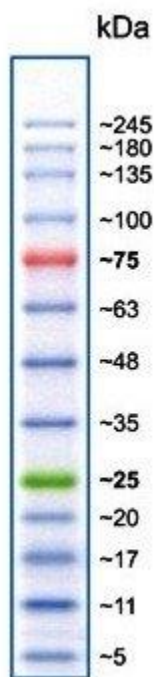

| UL |   |     |     | ML |   |     |     |
|----|---|-----|-----|----|---|-----|-----|
| C  | K | K+R | K+W | C  | K | K+R | K+W |

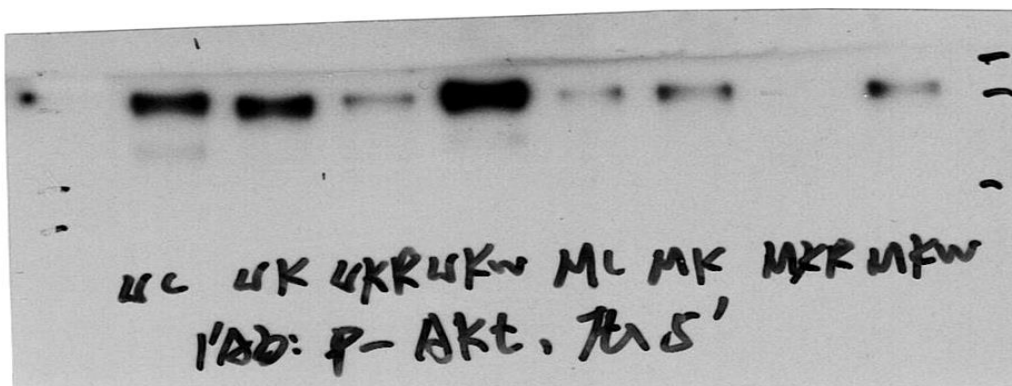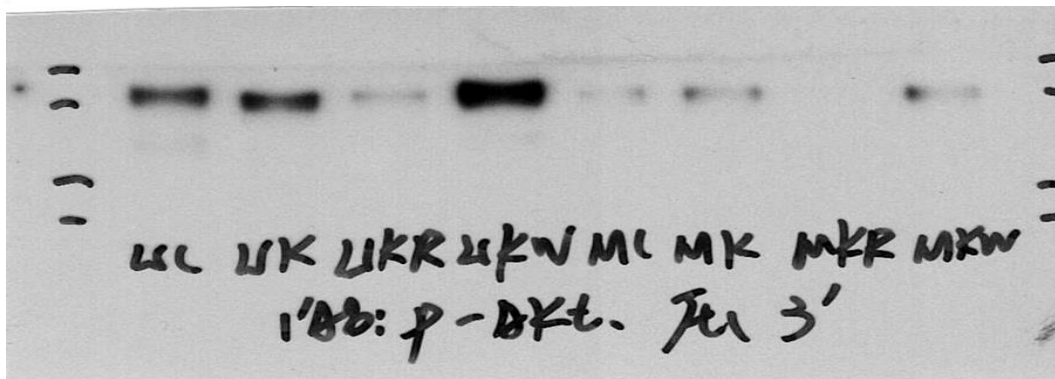



Western blot

Protein: GAPDH

1<sup>o</sup> Ab: Millipore, mouse monoclonal IgG1

Catalog number: no. MAB374      Molecular weight (kDa):36 kDa

Working concentration: 1:1000      Gel (%): 8%

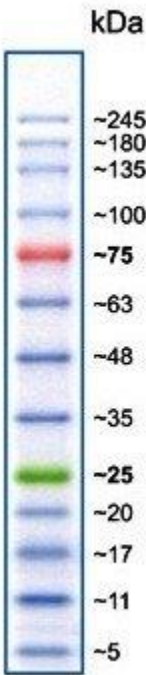

| UL |   |     |     | ML |   |     |     |
|----|---|-----|-----|----|---|-----|-----|
| C  | K | K+R | K+W | C  | K | K+R | K+W |

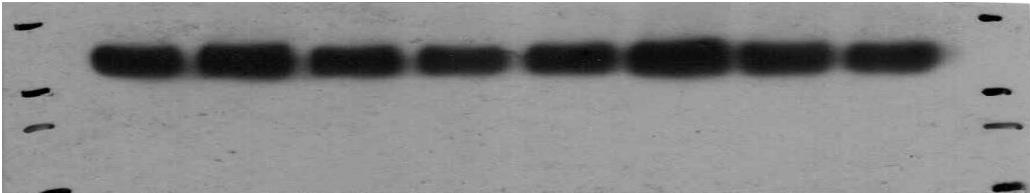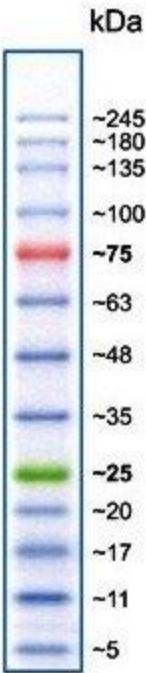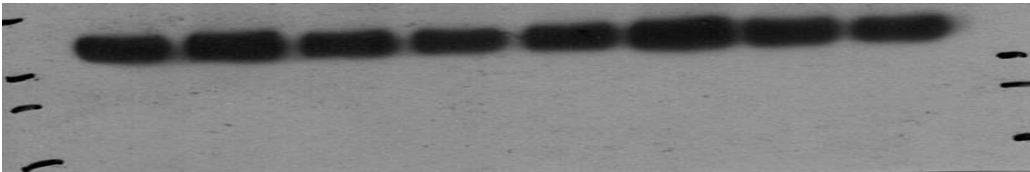

Supplement: s1 [file s1]
